# Supplementary material for: Stereodivergent sila-germylenation vs. sila-stannylenation of an internal alkyne
Source: Royal Society of Chemistry journal article supplement (doi:10.1039/d4cc02101k), 2024-01-01
Supplement: d4cc02101k1.pdf [file d4cc02101k1.pdf]

# Stereodivergent sila-germylenation vs sila-stannylenation of an internal alkyne

V. S. Ajithkumar,<sup>ab</sup> Pratiksha B. Ghanwat,<sup>ab</sup> Sougata Saha,<sup>c</sup> Swapan K Pati,<sup>\*c</sup> and Sakya S.

Sen<sup>\*ab</sup>

<sup>a</sup>Inorganic Chemistry and Catalysis Division, CSIR-National Chemical Laboratory, Dr. Homi Bhabha Road, Pashan, Pune 411008, India.

<sup>b</sup>Academy of Scientific and Innovative Research (AcSIR), Ghaziabad-201002, India.

<sup>c</sup>Theoretical Sciences Unit, School of Advanced Materials (SAMat), Jawaharlal Nehru Centre for Advanced Scientific Research, Bangalore-560064, India.

## Content

- ❖ NMR data of [PhC(NtBu)<sub>2</sub>]Ge{CCO<sub>2</sub>Me}<sub>2</sub>Si(SiMe<sub>3</sub>)<sub>3</sub>] (**3<sub>cis</sub>**).
- ❖ NMR data of [PhC(NtBu)<sub>2</sub>]Sn{CCO<sub>2</sub>Me}<sub>2</sub>Si(SiMe<sub>3</sub>)<sub>3</sub>] (**4<sub>trans</sub>**).
- ❖ Crystallographic data for the structural analysis of compounds **3<sub>cis</sub>** and **4<sub>trans</sub>**
- ❖ Details of theoretical calculations
- ❖ VT-NMR
- ❖ References

**General Experimental Information.** All experiments were carried out under argon atmosphere using Schlenk techniques or inside a MBRAUN or VTPL glove box. THF was purified by MBRAUN solvent purification system MB SPS-800 and stored over activated 4 Å molecular sieves prior to use. Benzene-d<sub>6</sub> was distilled over Na/benzophenone and stored over activated 4 Å molecular sieves prior to use. The precursors, [PhC(NtBu)<sub>2</sub>ESi(SiMe<sub>3</sub>)<sub>3</sub>] [E = Ge(**1**) and E = Sn(**2**)]<sup>S1</sup> were synthesized by previously reported literature procedures. Chemicals purchased from Sigma Aldrich and TCI Chemicals were used without further purification. The <sup>1</sup>H, <sup>13</sup>C, and <sup>29</sup>Si NMR spectra were recorded in C<sub>6</sub>D<sub>6</sub> using a Bruker Advance DPX 200 or a Bruker Advance DRX 400 or 500 spectrometers. NMR spectra were referenced to external SiMe<sub>4</sub> (<sup>1</sup>H, <sup>13</sup>C, <sup>29</sup>Si) and SnMe<sub>4</sub> (<sup>119</sup>Sn) respectively. Melting points were measured in a sealed glass tube using Stuart SMP-30 melting point apparatus and are uncorrected. High resolution mass spectra (HRMS) were obtained using a Q Exactive Thermo Scientific.

**Synthesis of compound **3**<sub>cis</sub>.** To a THF (5 mL) solution of **1** (0.150 g, 0.27 mmol), dimethyl acetylenedicarboxylate (0.038 g, 0.27 mmol) dissolved in THF (5 mL) was added drop by drop via a cannula at -78 °C. Upon addition, the solution turned red in color. The reaction mixture was allowed to reach room temperature slowly and stirred further for 6 hr. Subsequently the solution was filtered through a celite pad and the resulting filtrate was concentrated to get red crystals of **3**<sub>cis</sub> (0.181 g, 96 %). Mp: 109 °C.

<sup>1</sup>H NMR (400 MHz, C<sub>6</sub>D<sub>6</sub>, 298 K): δ 7.52-7.51 (d, 1H, *Ph*), δ 7.10-7.09 (d, 1H, *Ph*), δ 7.03-6.96 (m, 3H, *Ph*), δ 3.51 (s, 3H, GeCCOOMe), δ 3.42 (s, 3H, CCOOMeSi), δ 1.10 (s, 18H, *tBu*), δ 0.54 (s, 27H, SiMe<sub>3</sub>) ppm;

<sup>13</sup>C{<sup>1</sup>H} NMR (100.5 MHz, C<sub>6</sub>D<sub>6</sub>, 298 K): δ 172.4 (GeCCOOMe), δ 169.1 (COOMeSi), δ 167.4 (GeC=C), δ 164.7 (GeC=C), δ 144.6 (NCN), δ 133.4 (*Ph*), δ 128.3 (*Ph*), δ 126.5 (*Ph*), δ 50.5 (CMe<sub>3</sub>), δ 48.5 (GeCCOOMe), δ 47.4 (CCOOMeSi), δ 28.8 (CMe<sub>3</sub>), δ 0.22 (SiMe<sub>3</sub>) ppm;

<sup>29</sup>Si{<sup>1</sup>H} NMR (79.49 MHz, C<sub>6</sub>D<sub>6</sub>, 298 K): δ -12.13 {s, Si(SiMe<sub>3</sub>)<sub>3</sub>}, δ -74.97 {s, Si(SiMe<sub>3</sub>)<sub>3</sub>} ppm.

HRMS (CH<sub>3</sub>CN): m/z calcd for C<sub>30</sub>H<sub>56</sub>N<sub>2</sub>O<sub>4</sub>Si<sub>4</sub>Ge [M+H]<sup>+</sup>, 694.25; found, 694.6173.

Elemental analysis: C<sub>30</sub>H<sub>56</sub>N<sub>2</sub>O<sub>4</sub>Si<sub>4</sub>Ge; Calculated: C, 51.94; H, 8.14; N, 4.04; Found: C, 51.63; H, 7.99; N, 3.92.

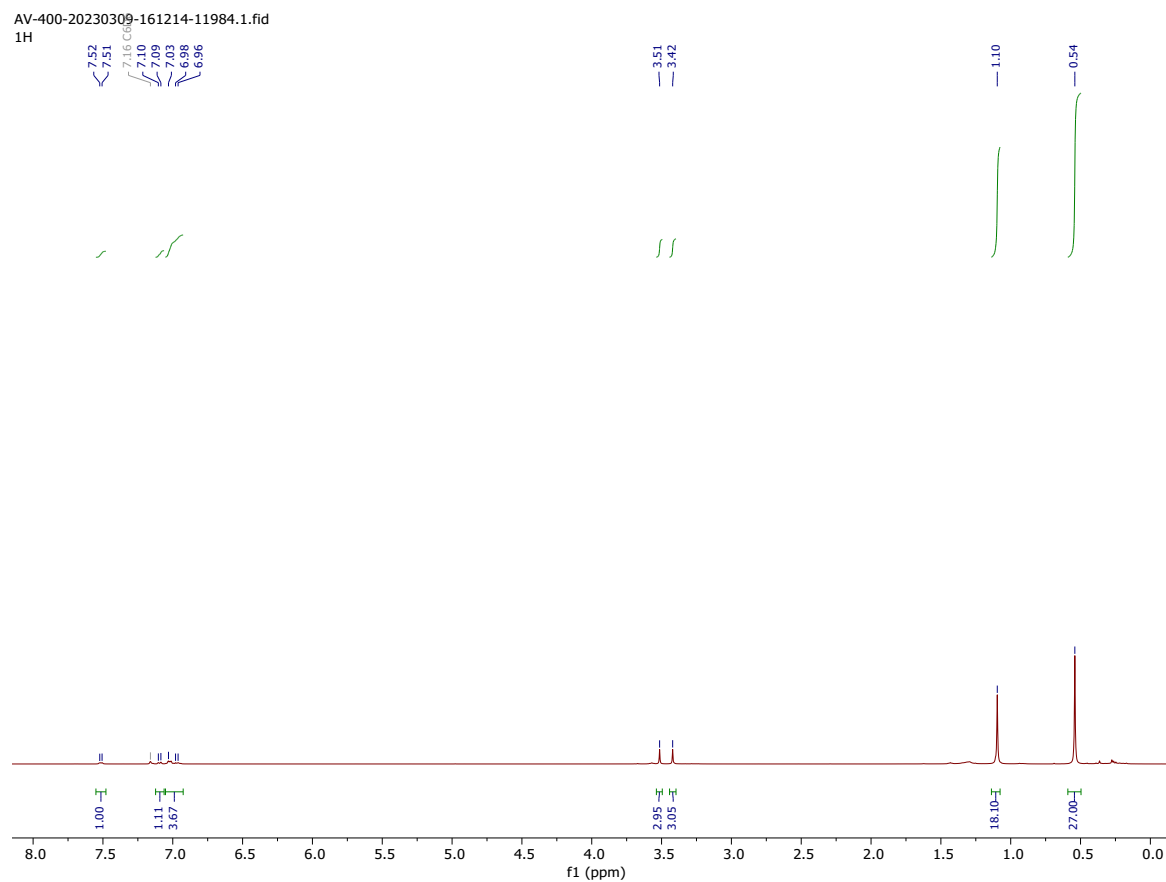

Figure S1. <sup>1</sup>H NMR Spectrum of **3<sub>cis</sub>** (C<sub>6</sub>D<sub>6</sub>, 400 MHz, 298 K)

AV-400-20230309-161214-11984.3.fid  
13 C

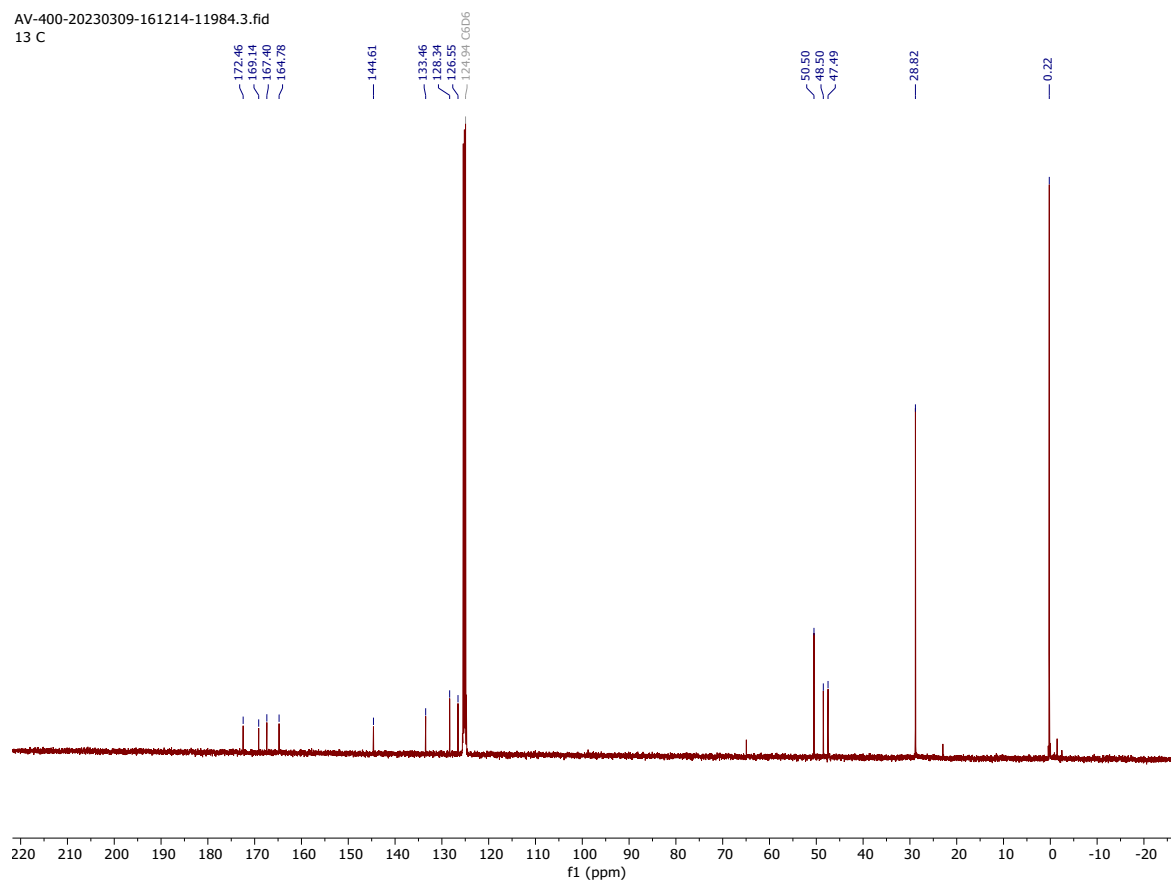

Figure S2. <sup>13</sup>C NMR Spectrum of **3<sub>cis</sub>** (C<sub>6</sub>D<sub>6</sub>, 100.61 MHz, 298 K)

AV-400-20230309-161214-11984  
29 Si

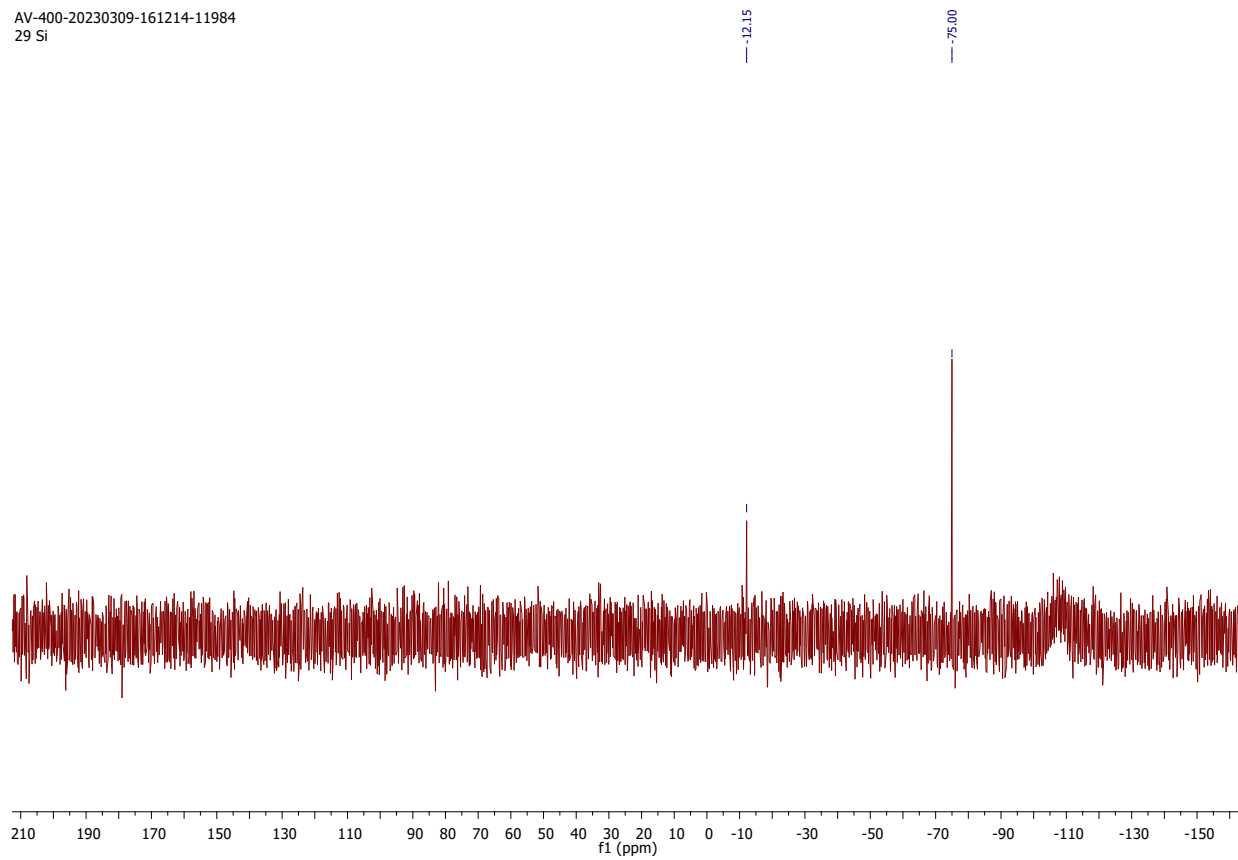

Figure S3.  $^{29}\text{Si}$  NMR Spectrum of  $\mathbf{3}_{cis}$  ( $\text{C}_6\text{D}_6$ , 79.49 MHz, 298 K).

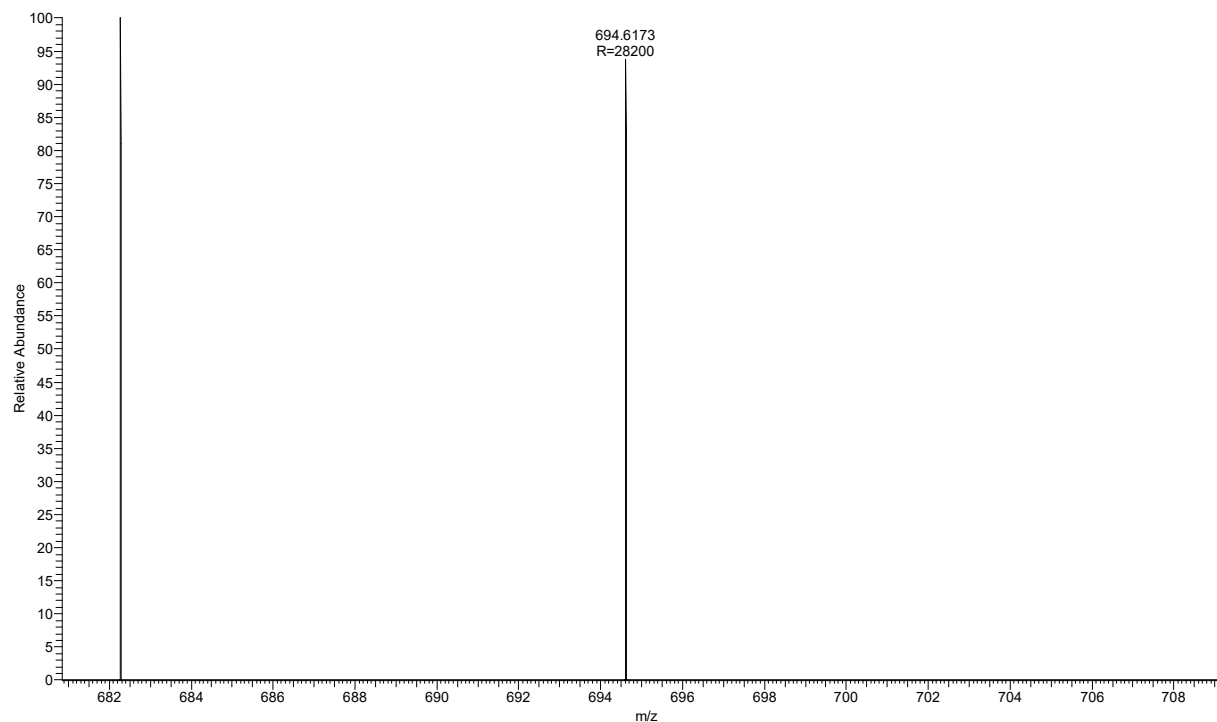

Figure S4. HRMS Spectrum of **3<sub>cis</sub>**

**Synthesis of compound 4<sub>trans</sub>.** To a THF (5 mL) solution of **2** (0.150 g, 0.25 mmol), dimethyl acetylenedicarboxylate (0.035 g, 0.25 mmol) dissolved in THF (5 mL) was added drop by drop via a cannula at  $-78\text{ }^{\circ}\text{C}$ . Upon addition, the solution turned dark red in color. The reaction mixture was allowed to reach room temperature slowly and stirred further for 6 hr. Subsequently the solution was filtered through a celite pad and the resulting filtrate was concentrated to get red crystals of **4<sub>trans</sub>** (0.130 g, 70 %). Mp:  $70\text{ }^{\circ}\text{C}$ .

$^1\text{H}$  NMR (400 MHz,  $\text{C}_6\text{D}_6$ , 298 K):  $\delta$  7.66-7.64 (d, 1H, *Ph*), 7.11-7.09 (m, 1H, *Ph*), 7.03-6.96 (m, 3H, *Ph*),  $\delta$  3.74 (s, 3H, SnCCOOMe),  $\delta$  3.50 (s, 3H, COOMeSi), 1.06 (s, 18H, *tBu*), 0.41 (s, 27H, SiMe<sub>3</sub>) ppm;

$^{13}\text{C}\{^1\text{H}\}$  NMR (100.66 MHz,  $\text{C}_6\text{D}_6$ , 298 K): 174.4 (SnCCOOMe),  $\delta$  172.9 (COOMeSi), 171.9 (SnC=C), 171.0 (SnC=C), 153.0 (NCN), 141 (Ph), 139.7 (Ph), 131.0 (Ph), 53.0 (CMe<sub>3</sub>), 52.5

(CMe<sub>3</sub>), 51.7 (CMe<sub>3</sub>), 50.8 (SnCCOOMe), 50.2 (CCOOMeSi), 32.6 (CMe<sub>3</sub>), 29.2 (CMe<sub>3</sub>), 2.6 (SiMe<sub>3</sub>), 1.4 (SiMe<sub>3</sub>), 0.5 (SiMe<sub>3</sub>) ppm;

<sup>29</sup>Si{<sup>1</sup>H} NMR (79.49 MHz, C<sub>6</sub>D<sub>6</sub>, 298 K): -11.4 {s, Si(SiMe<sub>3</sub>)<sub>3</sub>}, -76.9 {s, Si(SiMe<sub>3</sub>)<sub>3</sub>} ppm.

<sup>119</sup>Sn{<sup>1</sup>H} NMR (149.21 MHz, C<sub>6</sub>D<sub>6</sub>, 298 K): 0.66 ppm.

HRMS (CH<sub>3</sub>CN): m/z calcd for C<sub>30</sub>H<sub>56</sub>N<sub>2</sub>O<sub>4</sub>Si<sub>4</sub>Sn [M+H]<sup>+</sup>, 740.23; found, 741.2376.

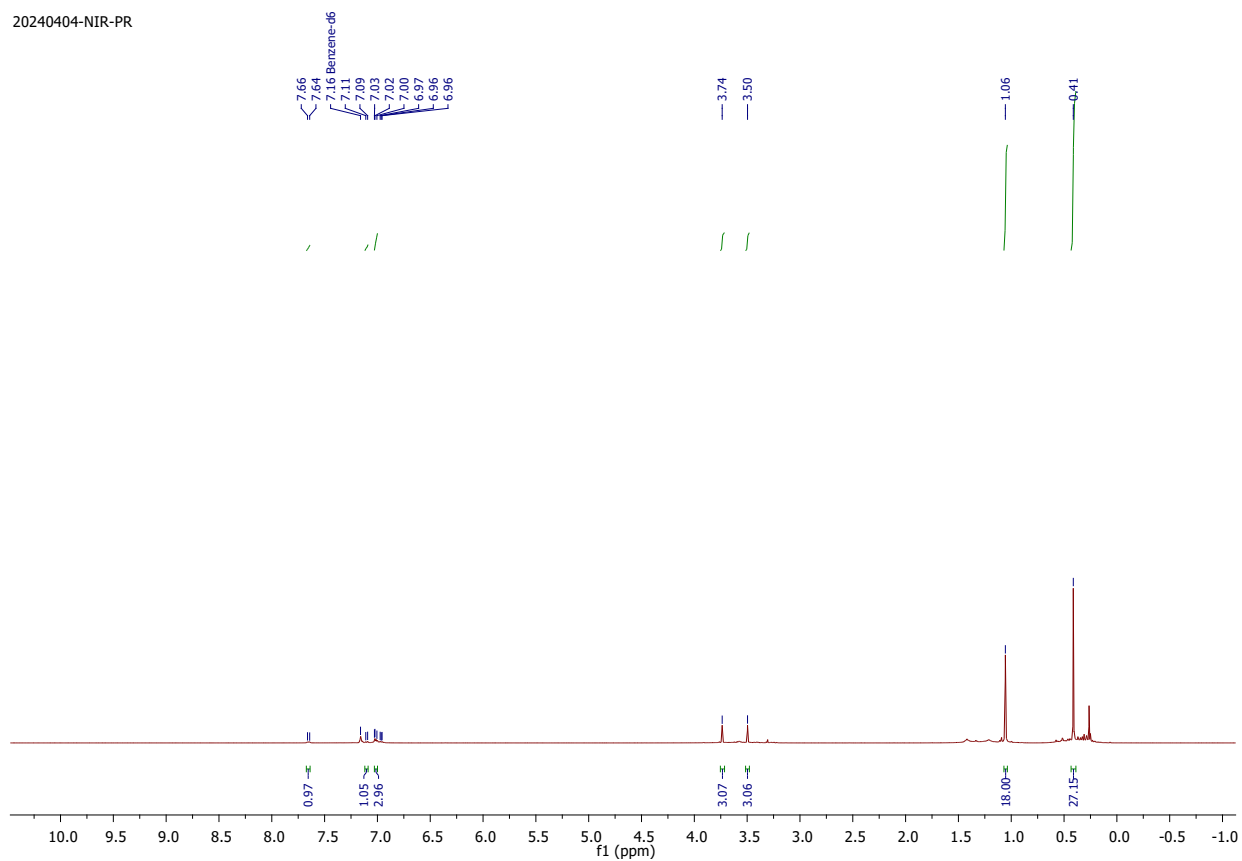

Figure S5. <sup>1</sup>H NMR Spectrum of **4<sub>trans</sub>** (C<sub>6</sub>D<sub>6</sub>, 400 MHz, 298 K)

20240404-NIR-PR

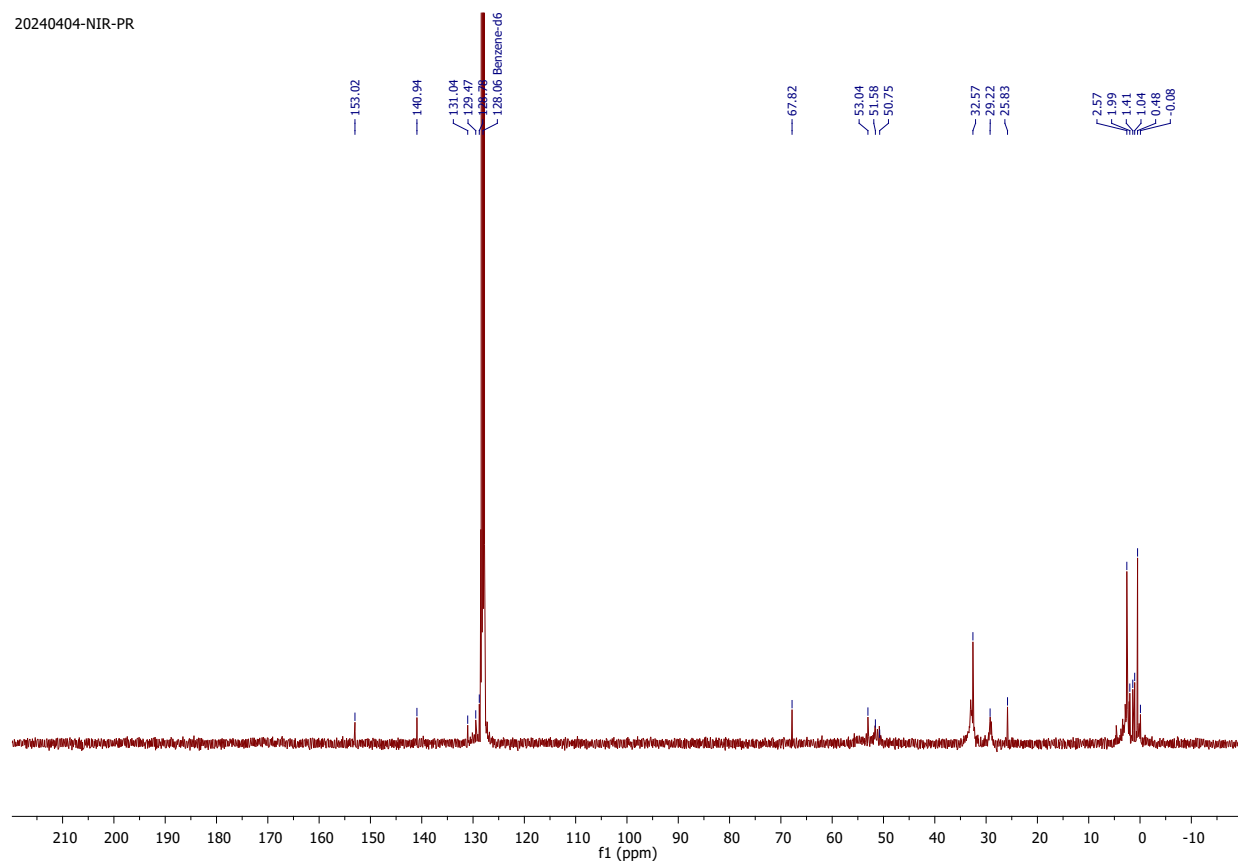

Figure S6.  $^{13}\text{C}$  NMR Spectrum of **4<sub>trans</sub>** ( $\text{C}_6\text{D}_6$ , 100.61 MHz, 298 K)



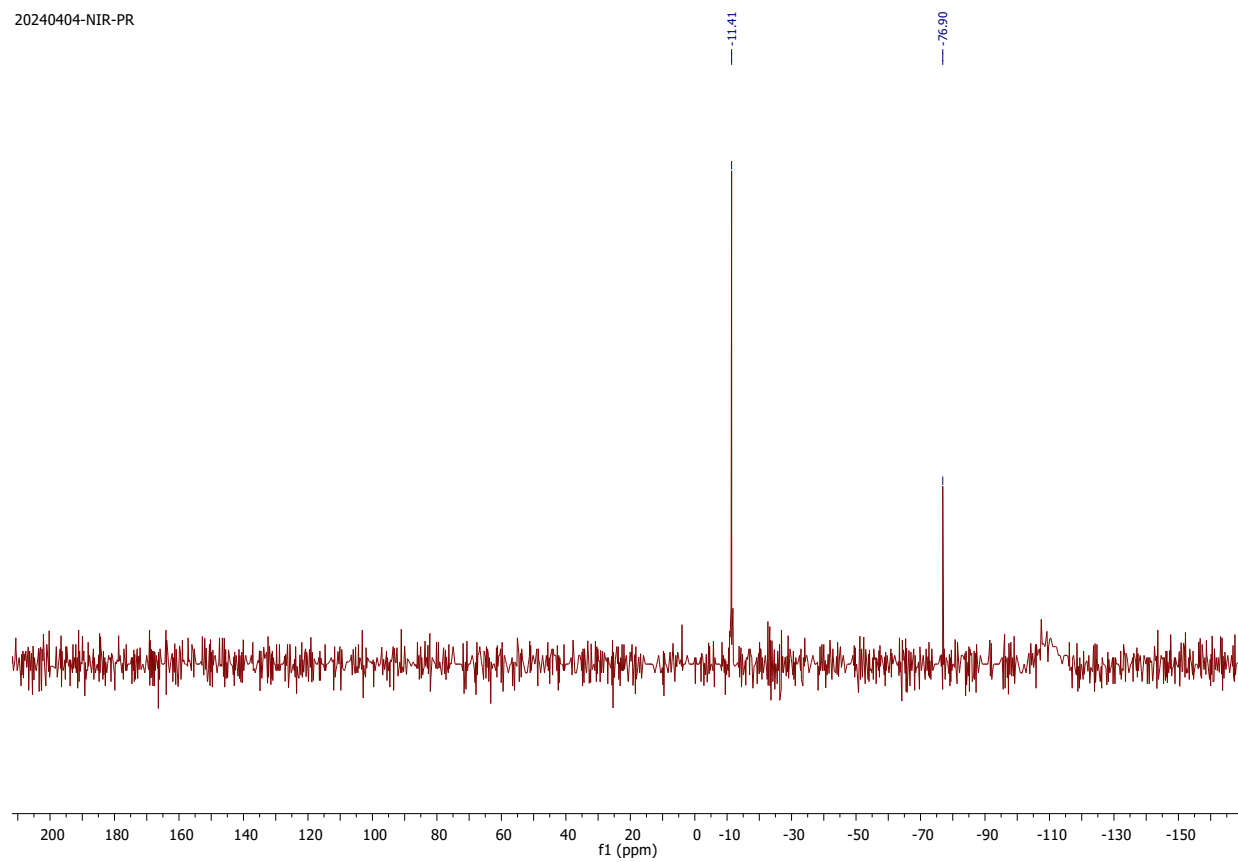

Figure S7.  $^{29}\text{Si}$  NMR Spectrum of **4***trans* ( $\text{C}_6\text{D}_6$ , 79.49 MHz, 298 K)

AV-400-20240427-104254-45272  
SN 119

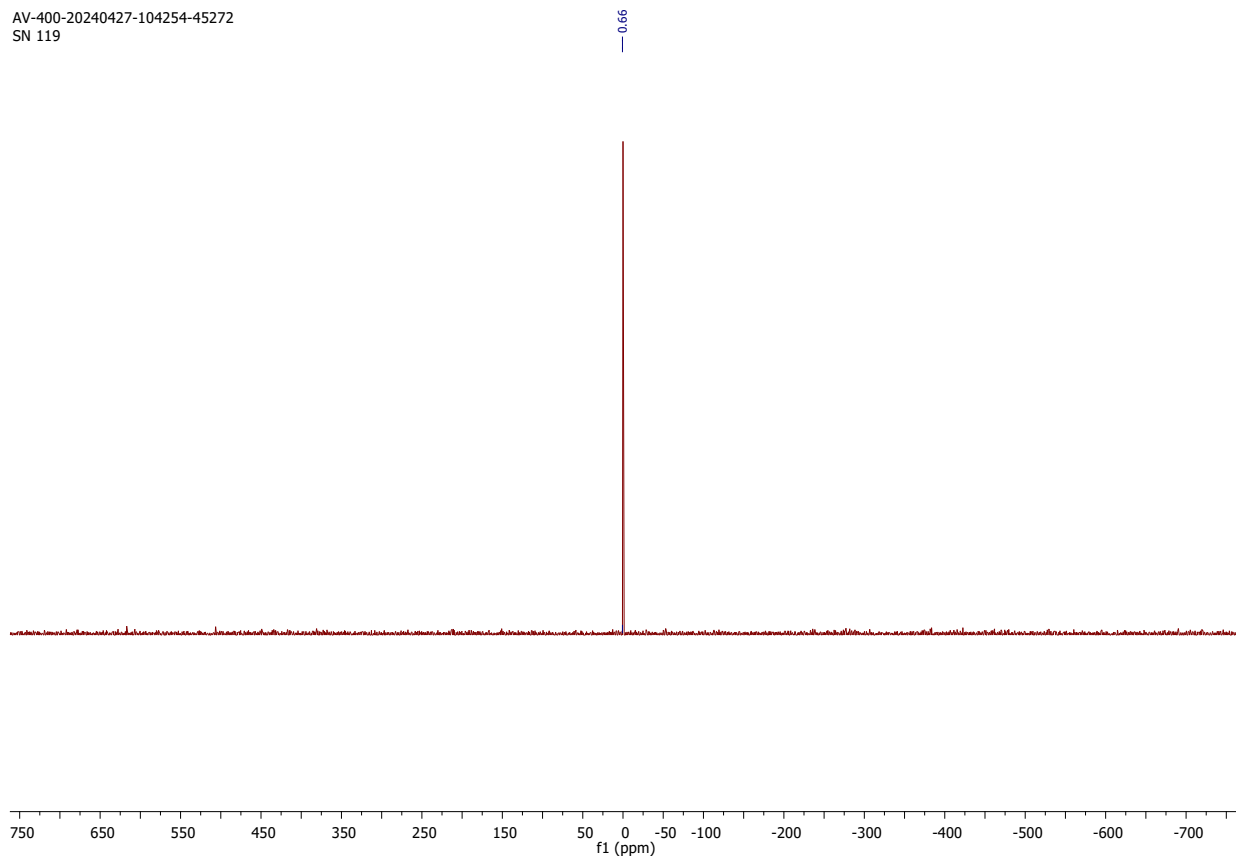

Figure S8.  $^{119}\text{Sn}$  NMR Spectrum of **4**<sub>trans</sub> ( $\text{C}_6\text{D}_6$ , 149.21 MHz, 298 K)

AJ-2\_240417112510 #929 RT: 5.00 AV: 1 NL: 1.61E4  
T: FTMS + p ESI Full ms [100.0000-1500.0000]

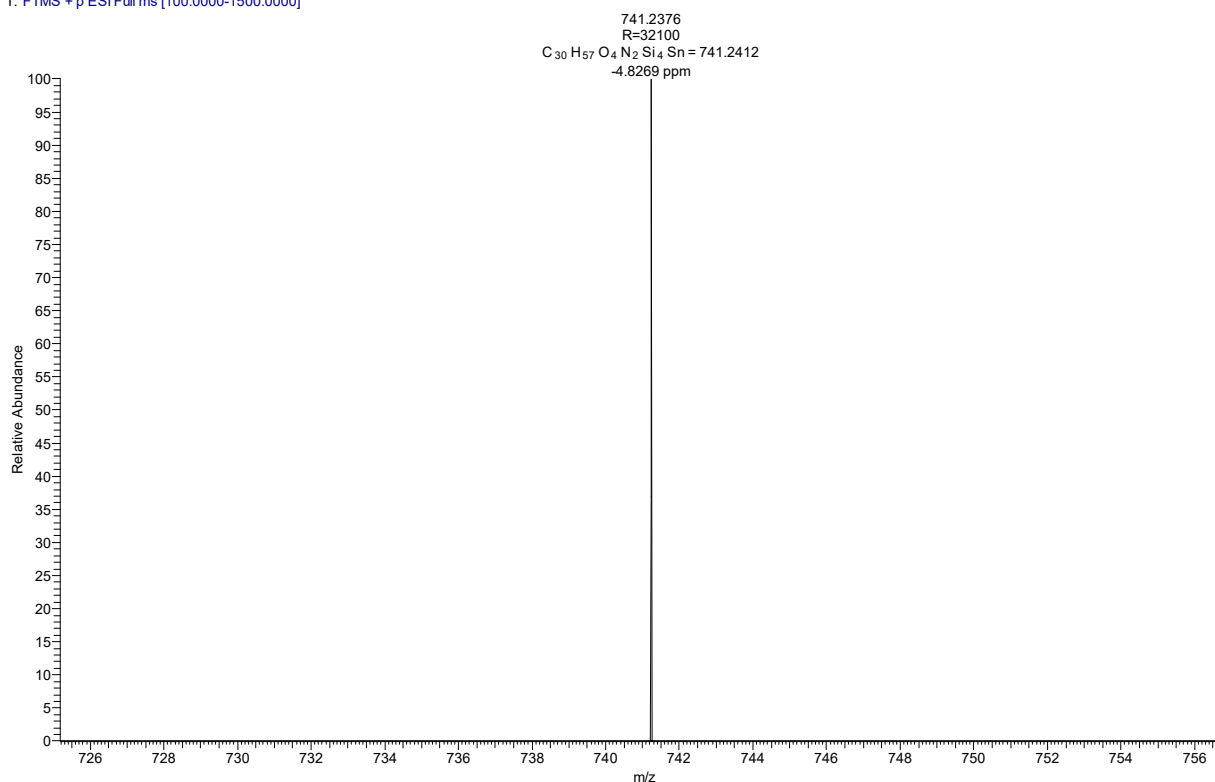

Figure S9. HRMS Spectrum of **4<sub>trans</sub>**

### Crystal Data and Structure Refinement for **3<sub>cis</sub>** and **4<sub>trans</sub>**

**X-ray Crystallography Details.** X-ray intensity data measurements were carried out on a Bruker SMART APEX II CCD diffractometer with graphite-monochromatized (MoK $\alpha$ = 0.71073Å) radiation. The X-ray generator was operated at 50 kV and 30 mA. A preliminary set of cell constants and an orientation matrix were calculated from three sets of 36 frames. Data were collected with  $\omega$  scan width of 0.5° at different settings of  $\varphi$  and  $2\theta$  keeping the sample-to-detector distance fixed at 5.00 cm. The X-ray data collection was monitored by APEX2 program (Bruker, 2006).<sup>S2</sup> All the data were corrected for Lorentzian, polarization, and absorption effects using SAINT and SADABS programs (Bruker, 2006). SHELX-97 was used for structure solution and full matrix least-squares refinement on

F2.<sup>S3</sup> All the hydrogen atoms were placed in geometrically idealized position and constrained to ride on their parent atoms.

| Identification code                    | <b>3<sub>cis</sub></b>                                                          | <b>4<sub>trans</sub></b>                                                         |
|----------------------------------------|---------------------------------------------------------------------------------|----------------------------------------------------------------------------------|
| Empirical formula                      | C <sub>34</sub> H <sub>64</sub> GeN <sub>2</sub> O <sub>5</sub> Si <sub>4</sub> | C <sub>30</sub> H <sub>56</sub> N <sub>2</sub> O <sub>4</sub> Si <sub>4</sub> Sn |
| Formula weight                         | 765.84                                                                          | 739.81                                                                           |
| Temperature/K                          | 100(2)                                                                          | 100(2)                                                                           |
| Crystal system                         | Triclinic                                                                       | monoclinic                                                                       |
| Space group                            | <i>P</i> -1                                                                     | <i>P</i> 2 <sub>1</sub> / <i>n</i>                                               |
| <i>a</i> /Å                            | 9.5714(9)                                                                       | 10.2751(10)                                                                      |
| <i>b</i> /Å                            | 13.2520(12)                                                                     | 15.1910(14)                                                                      |
| <i>c</i> /Å                            | 17.5019(15)                                                                     | 25.182(3)                                                                        |
| $\alpha$ /°                            | 97.149(3)                                                                       | 90                                                                               |
| $\beta$ /°                             | 97.276(3)                                                                       | 99.290(3)                                                                        |
| $\gamma$ /°                            | 102.064(3)                                                                      | 90                                                                               |
| Volume/Å <sup>3</sup>                  | 2127.2(3)                                                                       | 3879.1(6)                                                                        |
| <i>Z</i>                               | 2                                                                               | 4                                                                                |
| $\rho_{\text{calc}}$ /cm <sup>3</sup>  | 1.196                                                                           | 1.267                                                                            |
| $\mu$ /mm <sup>-1</sup>                | 0.870                                                                           | 0.815                                                                            |
| <i>F</i> (000)                         | 820.0                                                                           | 1552.0                                                                           |
| Crystal size/mm <sup>3</sup>           | 0.11 × 0.07 × 0.02                                                              | 0.11 × 0.1 × 0.06                                                                |
| Radiation                              | MoK $\alpha$ ( $\lambda$ = 0.71073)                                             | MoK $\alpha$ ( $\lambda$ = 0.71073)                                              |
| 2 $\theta$ range for data collection/° | 5.29 to 56.814                                                                  | 4.576 to 56.756                                                                  |
| Index ranges                           | -12 ≤ <i>h</i> ≤ 12, -17 ≤ <i>k</i> ≤                                           | -13 ≤ <i>h</i> ≤ 13, -20 ≤ <i>k</i> ≤                                            |

|                                                  |                                                                      |                                                                     |
|--------------------------------------------------|----------------------------------------------------------------------|---------------------------------------------------------------------|
|                                                  | 17, $-23 \leq l \leq 23$                                             | 20, $-33 \leq l \leq 33$                                            |
| Reflections collected                            | 97219                                                                | 218442                                                              |
| Independent reflections                          | 10635 [ $R_{\text{int}} = 0.0555$ ,<br>$R_{\text{sigma}} = 0.0275$ ] | 9701 [ $R_{\text{int}} = 0.0683$ ,<br>$R_{\text{sigma}} = 0.0208$ ] |
| Data/restraints/parameters                       | 10635/0/432                                                          | 9701/0/387                                                          |
| Goodness-of-fit on $F^2$                         | 1.041                                                                | 1.151                                                               |
| Final R indexes [ $l \geq 2\sigma$<br>(I)]       | $R_1 = 0.0317$ , $wR_2 =$<br>0.0833                                  | $R_1 = 0.0311$ , $wR_2 =$<br>0.0706                                 |
| Final R indexes [all data]                       | $R_1 = 0.0357$ , $wR_2 =$<br>0.0861                                  | $R_1 = 0.0354$ , $wR_2 =$<br>0.0724                                 |
| Largest diff. peak/hole / e<br>$\text{\AA}^{-3}$ | 0.70/-0.93                                                           | 0.61/-0.87                                                          |
| CCDC No.                                         | 2347985                                                              | 2347987                                                             |

### Details theoretical calculations

All DFT calculations were conducted utilizing the Gaussian 16<sup>S4</sup> software codes. The M062X<sup>S5</sup> global hybrid functional was used which comprises 54% Hartree-Fock exchange, specifically tailored for the study of main group elements. Grimme's D3<sup>S6</sup> dispersion model was taken into account to consider the non-covalent interactions. We used the 6-311++G(d,p) basis set for lighter elements (C, H, N, O, Si) and the Def2TZVP<sup>S7</sup> basis set with SDD<sup>S8</sup> ECP for heavy elements (Ge and Sn).

Optimized structures were confirmed as minima through harmonic vibrational frequency analysis. True minima were detected by possessing all positive frequencies, while transition state (TS) structures were distinguished by a single vibrational negative frequency. In addition, intrinsic reaction coordinate (IRC) calculations were performed on all the TS structures to elucidate the connectivity between successive minimum chemical structures (reactant and product) via the corresponding TS structure.

Thermochemical data were calculated employing the ideal gas rigid rotor simple harmonic oscillator approximation at 298.15K and 1atm. For the estimation of Gibbs free energy, zero-point energy corrections were included. To account for solvent effects, we employed the SMD<sup>S9</sup> continuum solvation model with tetrahydrofuran (THF) solvent, which was also being used experimentally. All natural bonding orbital analysis (NBO) was conducted using NBO 3.1,<sup>S10</sup> the built-in version in Gaussian 16.

The hypersilyl moiety stabilizes both germylene and the stannylene systems, with a Ge-Si bond length of 2.49 Å and a Sn-Si bond length of 2.68 Å (Figure S10) and. As germylene and stannylene are the heavier analogs of carbene, they contain two electrons which are not shared by other atoms. Thus, there are two possible spin states, one is singlet with  $S=0$  and  $S_z=0$ , where electrons exhibit antiparallel alignment and the other is triplet with  $S=1$  and three degenerate  $S_z$  states; we target  $S=1$  and  $S_z=1$  state, where electrons are parallel to each other. In both the systems, the singlet state is found to be more stable than the triplet state. The singlet state exhibits a stability advantage of 35.88 kcal/mol over the triplet state in the germylene system, whereas in the stannylene system, this energy difference is 33.69 kcal/mol.

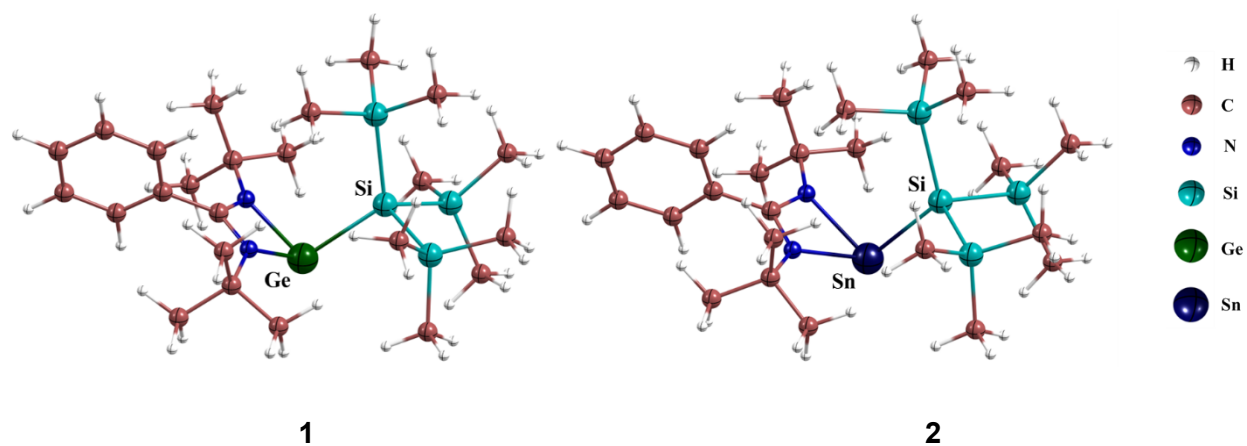

Figure S10. Optimized structures of germylene (left) and stannylene (right)

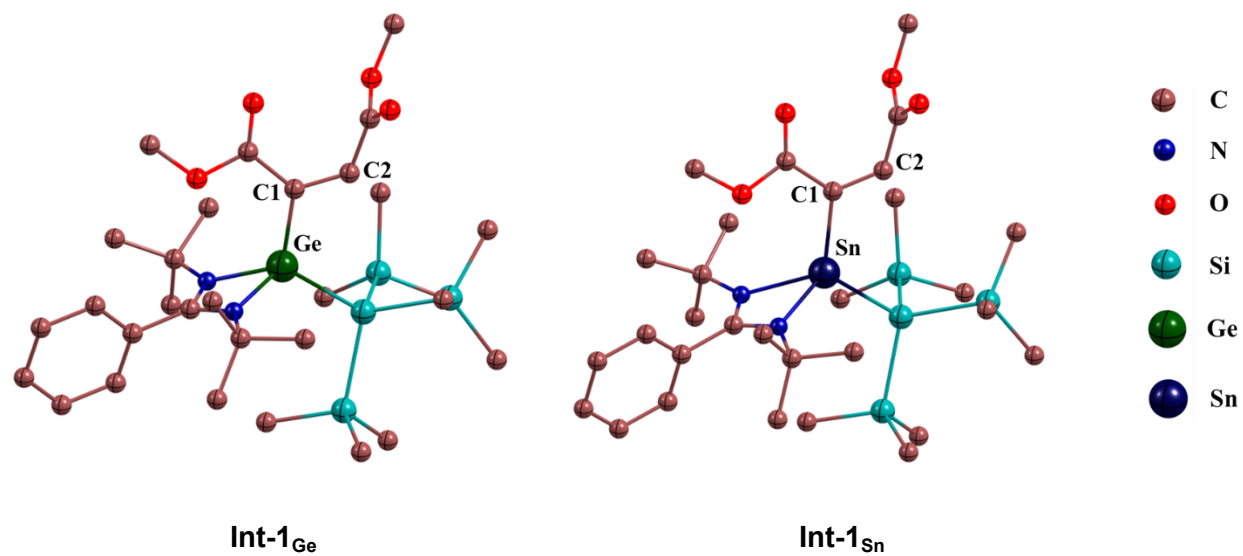

Figure S11. Reaction intermediates for germylene and stannylene. For visual clarity hydrogen atoms are removed.

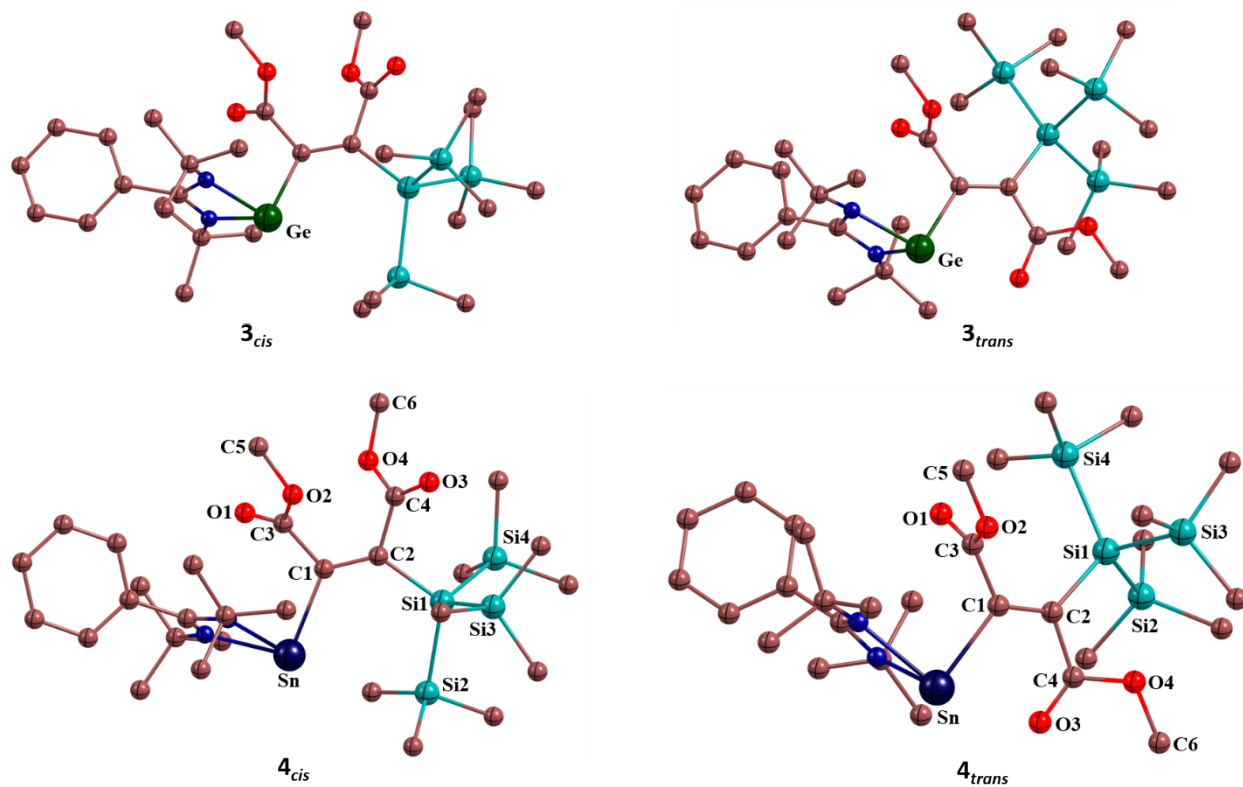

Figure S12. All possible products of the reactions are demonstrated here. Cis ( $\mathbf{3}_{cis}$ ) and trans ( $\mathbf{3}_{trans}$ ) products from the germylene ( $\mathbf{1}$ ) (above) and cis ( $\mathbf{4}_{cis}$ ) and trans ( $\mathbf{4}_{trans}$ ) products from the stannylene ( $\mathbf{2}$ ) (below). The labelled atoms indicate those involved in the electron transfer process, with similar notations applied to both systems for the same configurations (cis or trans).



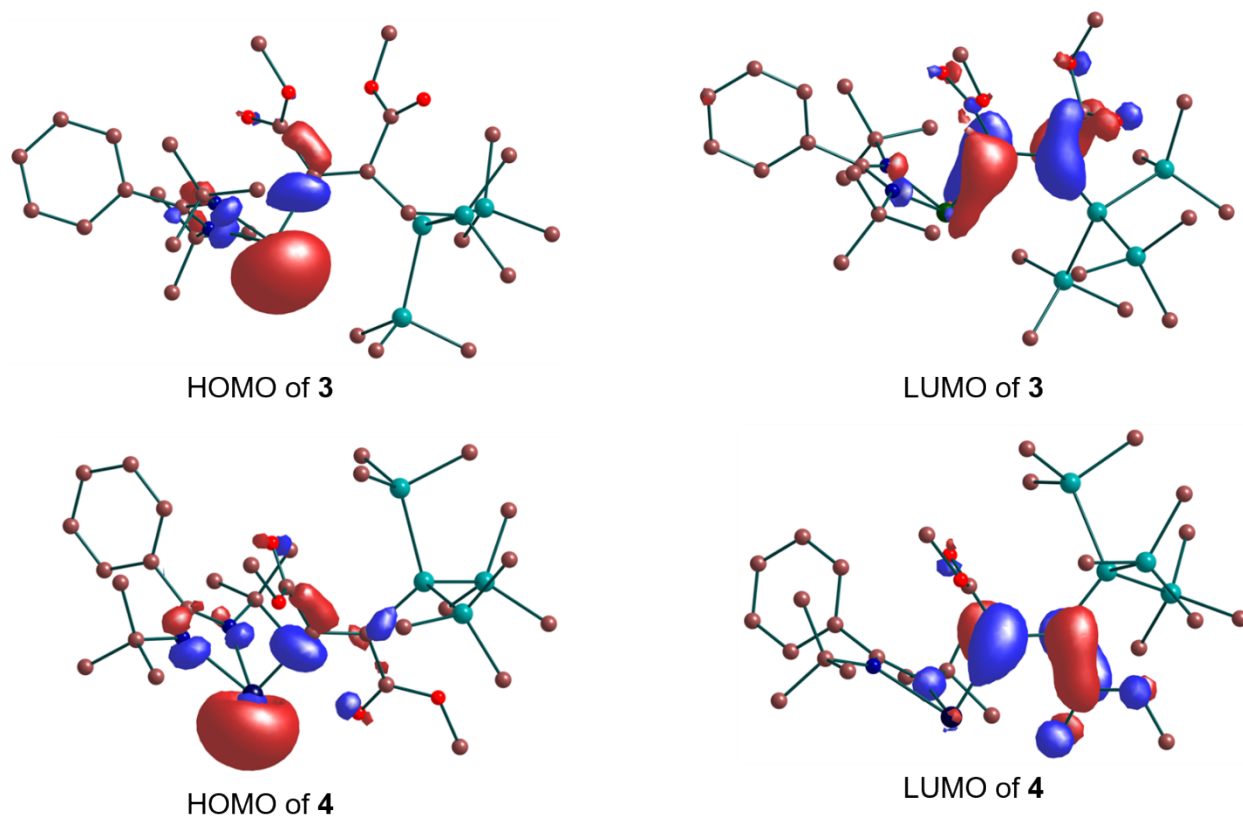

Figure S13. The molecular orbital plots of  $\mathbf{3}_{cis}$  and  $\mathbf{4}_{trans}$  with an isosurface value of 0.05 au. Hydrogen atoms are removed for clarity.

### VT NMR

In DFT calculations, the  $\mathbf{3}_{cis}$  formation requires 12.4 kcal/mol, while the  $\mathbf{4}_{trans}$  requires 29.7 kcal/mol energy barrier after the formation of kinetic product  $\mathbf{4}_{cis}$ . Hence, we have performed a VT NMR, which indicates the formation of both  $\mathbf{4}_{cis}$  and  $\mathbf{4}_{trans}$  at low temperature.

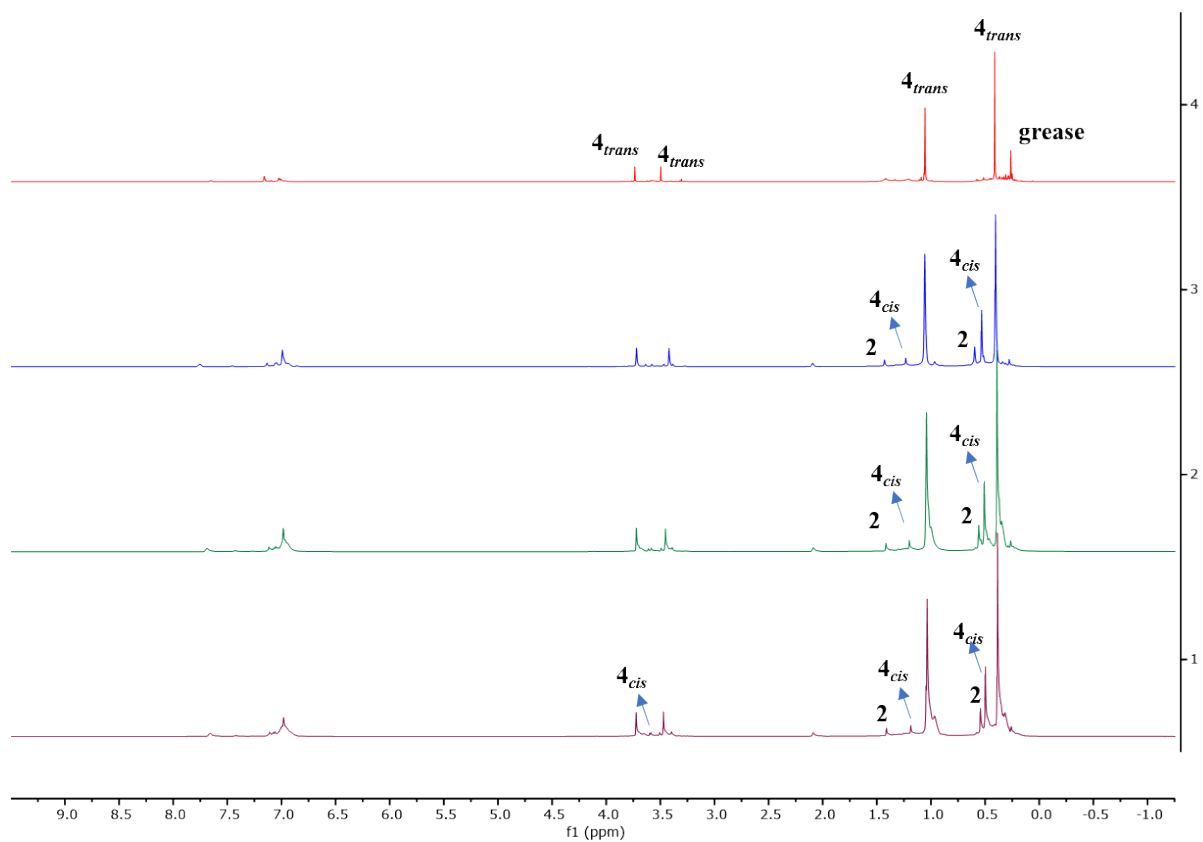

Figure S14. The full spectrum of VT NMR. The lowest set was recorded at  $-20\text{ }^{\circ}\text{C}$ , followed by  $-10\text{ }^{\circ}\text{C}$ , then at  $0\text{ }^{\circ}\text{C}$ , and the highest one was done at room temperature.

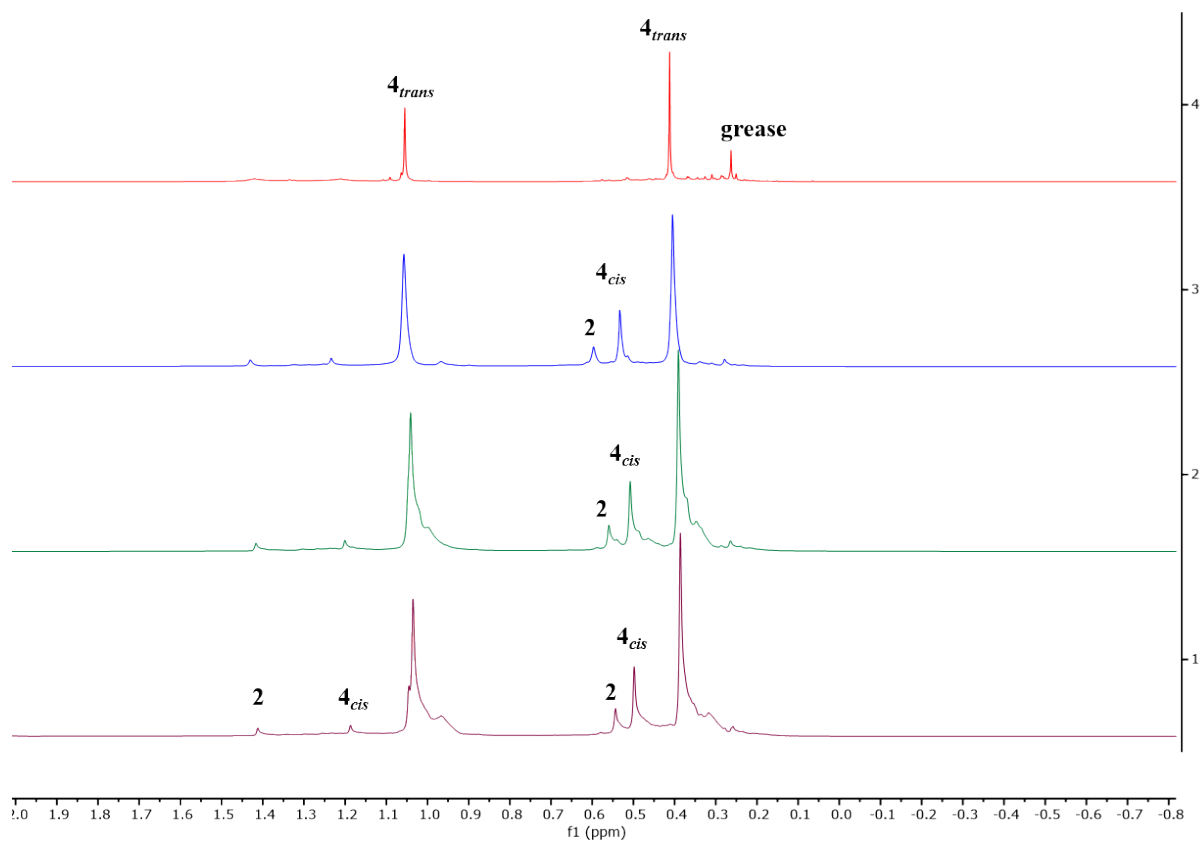

Figure S15. The enlarged version of the VT NMR for hypersilyl and *t*Bu region, which clearly indicates the formation of  $4_{cis}$  at low temperature, but diminishes with gradual increase of the temperature. The lowest set was recorded at -20 °C, followed by -10 °C, then at 0 °C, and the highest one was done at room temperature.

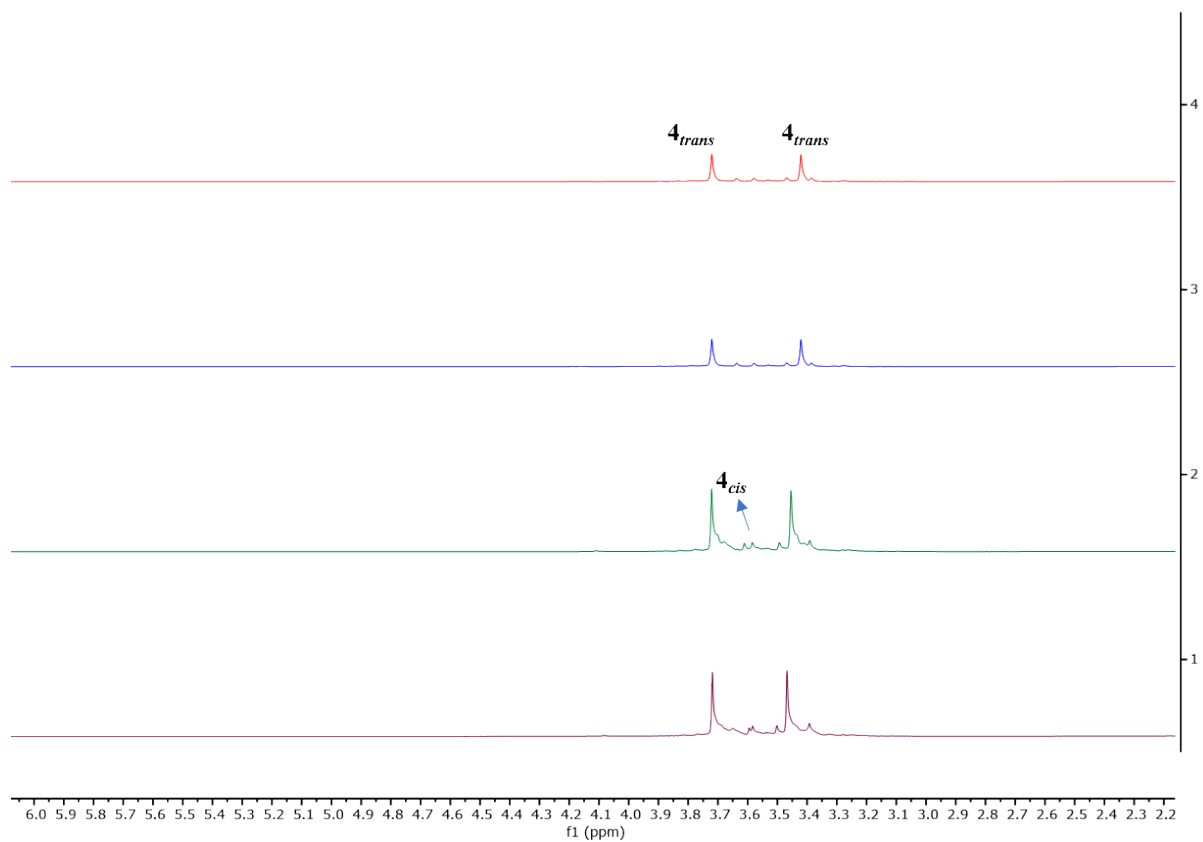

Figure S16. The enlarged version of the VT NMR for  $-\text{COOMe}$  resonances, which also indicates the formation of  $4_{cis}$  at low temperature as an intermediate, but diminishes with gradual increase of the temperature. The lowest set was recorded at  $-20\text{ }^{\circ}\text{C}$ , followed by  $-10\text{ }^{\circ}\text{C}$ , then at  $0\text{ }^{\circ}\text{C}$ , and the highest one was done at room temperature.

## References:

- S1. M. K. Bisai, V. S. Ajithkumar, R. G. Gonnade and S. S. Sen, *Organometallics* **2021**, *40*, 2651–2657.
- S2. Bruker (2006). APEX2, SAINT and SADABS. Bruker AXS Inc. Madison, Wisconsin, USA.
- S3. G.M. Sheldrick, G. M. A Short History of SHELX. *Acta Crystallogr*, **2008**, *A64*, 112–122.
- S4. Gaussian 16, Revision C.01, M. J. Frisch, G. W. Trucks, H. B. Schlegel, G. E. Scuseria, M. A. Robb, J. R. Cheeseman, G. Scalmani, V. Barone, G. A. Petersson, H. Nakatsuji, X. Li, M. Caricato, A. V. Marenich, J. Bloino, B. G. Janesko, R. Gomperts, B. Mennucci, H. P. Hratchian, J. V. Ortiz, A. F. Izmaylov, J. L. Sonnenberg, D. Williams-Young, F. Ding, F. Lipparini, F. Egidi, J. Goings, B. Peng, A. Petrone, T. Henderson, D. Ranasinghe, V. G. Zakrzewski, J. Gao, N. Rega, G. Zheng, W. Liang, M. Hada, M. Ehara, K. Toyota, R. Fukuda, J. Hasegawa, M. Ishida, T. Nakajima, Y. Honda, O. Kitao, H. Nakai, T. Vreven, K. Throssell, J. A. Montgomery, Jr., J. E. Peralta, F. Ogliaro, M. J. Bearpark, J. J. Heyd, E. N. Brothers, K. N. Kudin, V. N. Staroverov, T. A. Keith, R. Kobayashi, J. Normand, K. Raghavachari, A. P. Rendell, J. C. Burant, S. S. Iyengar, J. Tomasi, M. Cossi, J. M. Millam, M. Klene, C. Adamo, R. Cammi, J. W. Ochterski, R. L. Martin, K. Morokuma, O. Farkas, J. B. Foresman, and D. J. Fox, Gaussian, Inc., Wallingford CT, 2016.
- S5. Y. Zhao and G. D. Truhlar, *Theor. Chem. Acc.* 2008, **120**, 215– 241.
- S6. S. Grimme, J. Antony, S. Ehrlich and H. A. Krieg, *J. Chem. Phys.*, 2010, **132**, 154104–154119.

- S7. F. Weigend and R. Ahlrichs, *Phys. Chem. Chem. Phys.*, 2005, **7**, 3297–3305.
- S8. D. Andrae, U. Haeussermann, M. Dolg, H. Stoll and H. Preuss, *Theor. Chem. Acc.*, 1990, **77**, 123–141.
- S9. A. V. Marenich, C. J. Cramer and D. G. Truhlar, *J. Phys. Chem. B.*, 2009, **113**, 6378–639.
- S10. D. E. Glendening, A. E. Reed, J. E. Carpenter and F. Weinhold, NBO, version 3.1.; University of Wisconsin: Madison, WI, 1993.

|    |             |             |             |            |             |             |             |
|----|-------------|-------------|-------------|------------|-------------|-------------|-------------|
| 1  |             |             | H           | 2.33933200 | -2.51676200 | -2.76194000 |             |
| 81 |             |             | C           | 3.60029500 | -0.02510500 | 0.16020000  |             |
| Si | -1.82206500 | -0.05246800 | 0.03968500  | C          | -4.36975100 | -0.50391700 | -2.31234500 |
| Si | -3.52884000 | -1.39210100 | -0.87202700 | H          | -5.10327400 | -1.16752800 | -2.78383700 |
| Si | -1.43984200 | -0.74862600 | 2.24784900  | H          | -4.89573000 | 0.39721800  | -1.98619800 |
| Si | -2.84514200 | 2.06190700  | 0.19808100  | H          | -3.64126500 | -0.21263700 | -3.07553100 |
| N  | 1.48489900  | 1.14383100  | -0.57044800 | C          | 0.40837500  | -3.13683500 | -0.90214100 |
| N  | 1.47611100  | -1.01545400 | -0.72340400 | H          | 0.00941200  | -2.85589200 | -1.88200500 |
| C  | 3.85658700  | 0.11397000  | 1.52451600  | H          | 0.51373500  | -4.22406200 | -0.87902200 |
| H  | 3.03874300  | 0.29712200  | 2.21234000  | H          | -0.31133700 | -2.83723600 | -0.13819500 |
| C  | 2.20066000  | 0.03659400  | -0.35860900 | C          | -4.82361600 | -1.75442800 | 0.45731200  |
| C  | 1.94380500  | 2.54617100  | -0.60035700 | H          | -5.65761300 | -2.31853100 | 0.02433600  |
| C  | 1.75966100  | -2.45832700 | -0.67163600 | H          | -5.22767800 | -0.83954900 | 0.89797700  |
| C  | 3.16213000  | 2.74000800  | -1.51164300 | C          | -2.95457300 | -3.06433400 | -1.53590200 |
| H  | 2.97947500  | 2.28957800  | -2.49165600 | H          | -2.26582300 | -2.95020000 | -2.37730100 |
| H  | 3.34381900  | 3.80907700  | -1.65367300 | H          | -2.46200400 | -3.66974300 | -0.77027000 |
| H  | 4.06486000  | 2.30223700  | -1.08412300 | H          | -3.82855600 | -3.62100900 | -1.89317600 |
| C  | 2.32701000  | -2.88559000 | 0.68674200  | C          | -1.35203000 | -2.62765600 | 2.44617000  |
| H  | 1.72812500  | -2.47495000 | 1.50429600  | H          | -0.43150100 | -3.05077900 | 2.03818500  |
| H  | 2.30717200  | -3.97654100 | 0.75827000  | C          | 2.25355000  | 3.05008100  | 0.81348700  |
| H  | 3.36079000  | -2.56037200 | 0.81591500  | H          | 3.14765300  | 2.57518500  | 1.21941000  |
| C  | 2.71088800  | -2.87790800 | -1.79905700 | H          | 1.41526200  | 2.84577600  | 1.48419700  |
| H  | 3.71664600  | -2.48757800 | -1.63993400 | C          | -1.94606300 | 3.15913500  | 1.45536500  |
| H  | 2.77501700  | -3.96904600 | -1.83990800 | H          | -2.16584700 | 4.21575200  | 1.26530700  |

|    |             |             |             |          |             |             |             |
|----|-------------|-------------|-------------|----------|-------------|-------------|-------------|
| H  | -2.29186500 | 2.92863500  | 2.46762800  | <b>2</b> |             |             |             |
| H  | -0.86168100 | 3.03301000  | 1.44186900  | 81       |             |             |             |
| C  | -4.63972500 | 1.96780400  | 0.78752200  | Si       | -1.92877700 | 0.00446000  | 0.16380700  |
| H  | -5.27943800 | 1.44368200  | 0.07245500  | Si       | -3.59710600 | -1.45781000 | -0.61543800 |
| H  | -4.72529000 | 1.46522100  | 1.75493400  | Si       | -1.46178900 | -0.62935100 | 2.37019800  |
| H  | -5.03290700 | 2.98484900  | 0.90273100  | Si       | -2.99783100 | 2.09963200  | 0.16992400  |
| C  | 0.77831600  | 3.35357600  | -1.17385100 | N        | 1.62667300  | 1.08320600  | -0.66359800 |
| H  | -0.12089600 | 3.20714700  | -0.57311800 | N        | 1.60758600  | -1.11515600 | -0.60437900 |
| H  | 1.01986700  | 4.41887400  | -1.17403800 | C        | 3.92500500  | 0.12653800  | 1.59697900  |
| H  | 0.56722500  | 3.04995100  | -2.20348400 | H        | 3.09112200  | 0.17305700  | 2.28820500  |
| C  | -2.88612900 | 2.90634400  | -1.49415800 | C        | 2.29942300  | -0.01344600 | -0.32747400 |
| H  | -1.91105400 | 2.92732700  | -1.98630000 | C        | 1.94707200  | 2.49958500  | -0.43590600 |
| H  | -3.57870000 | 2.38123400  | -2.15860300 | C        | 1.97995800  | -2.52957200 | -0.45701400 |
| H  | -3.23816200 | 3.93931000  | -1.39430400 | C        | 3.36824500  | 2.90263700  | -0.85178700 |
| C  | 0.19797600  | -0.00382800 | 2.81188500  | H        | 3.59977400  | 2.52773600  | -1.85251100 |
| H  | 0.49116300  | -0.35902900 | 3.80568000  | H        | 3.43471500  | 3.99417300  | -0.87149400 |
| H  | 0.97584100  | -0.28720500 | 2.09801900  | H        | 4.12388600  | 2.53644800  | -0.15577900 |
| H  | 0.14494800  | 1.08904100  | 2.83743600  | C        | 2.36274200  | -2.87192500 | 0.98854900  |
| C  | -2.82392500 | -0.16709800 | 3.39600600  | H        | 1.60756100  | -2.49495600 | 1.68445900  |
| H  | -2.92172200 | 0.92139900  | 3.40418100  | H        | 2.42839300  | -3.95752400 | 1.10458600  |
| C  | 5.15872500  | 0.01112300  | 2.00393600  | H        | 3.33014100  | -2.44747300 | 1.26082100  |
| C  | 4.65860000  | -0.25094900 | -0.72129200 | C        | 3.10503000  | -2.94011900 | -1.41503500 |
| H  | -4.39697400 | -2.35853200 | 1.26412600  | H        | 4.06002100  | -2.49961900 | -1.12638200 |
| H  | -1.38636900 | -2.87766600 | 3.51270500  | H        | 3.22030900  | -4.02801800 | -1.40609500 |
| H  | -2.19771900 | -3.12581700 | 1.96195900  | H        | 2.86635700  | -2.62763400 | -2.43573000 |
| H  | 2.42656300  | 4.12970000  | 0.79141200  | C        | 3.69090200  | 0.00208000  | 0.22819700  |
| H  | -3.78779100 | -0.59278500 | 3.10129100  | C        | -4.44644500 | -0.74004300 | -2.14355300 |
| H  | -2.61404300 | -0.49247000 | 4.42144000  | H        | -5.14974200 | -1.47007600 | -2.55973400 |
| H  | 5.34941800  | 0.11298000  | 3.06604100  | H        | -5.00910300 | 0.16696700  | -1.90559500 |
| C  | 6.21128400  | -0.22246100 | 1.12329100  | H        | -3.71927200 | -0.49282500 | -2.92341000 |
| H  | 4.46292600  | -0.33650900 | -1.78447100 | C        | 0.71374800  | -3.30511100 | -0.83275500 |
| C  | 5.96029100  | -0.34692000 | -0.24082000 | H        | 0.45598500  | -3.12843700 | -1.88269900 |
| H  | 7.22526500  | -0.30271700 | 1.49805600  | H        | 0.85745600  | -4.37953200 | -0.69595500 |
| H  | 6.77748500  | -0.51742100 | -0.93215300 | H        | -0.12484700 | -2.98246100 | -0.21046400 |
| Ge | 0.06174500  | 0.11878000  | -1.58624900 | C        | -4.92058100 | -1.78934800 | 0.69367700  |
|    |             |             |             | H        | -5.70692600 | -2.42679000 | 0.27302500  |

|   |             |             |             |                           |             |             |             |
|---|-------------|-------------|-------------|---------------------------|-------------|-------------|-------------|
| H | -5.38864100 | -0.86721000 | 1.04719300  | H                         | -2.37874900 | -2.96024400 | 2.31368700  |
| C | -2.88700100 | -3.13654900 | -1.11546500 | H                         | 1.82933000  | 3.93227300  | 1.19208600  |
| H | -2.15474500 | -3.04099500 | -1.92311300 | H                         | -3.77531100 | -0.40642500 | 3.29431500  |
| H | -2.40120700 | -3.63921000 | -0.27413800 | H                         | -2.56354500 | -0.30048200 | 4.58084300  |
| H | -3.69485500 | -3.78557800 | -1.47236500 | H                         | 5.40349800  | 0.27815500  | 3.14563200  |
| C | -1.41036600 | -2.51017500 | 2.55101000  | C                         | 6.30513100  | 0.11254500  | 1.19942900  |
| H | -0.65663100 | -2.97127400 | 1.90821100  | H                         | 4.59010600  | -0.16093600 | -1.71769300 |
| C | 1.70854400  | 2.85591700  | 1.03569600  | C                         | 6.07416400  | -0.01778900 | -0.16798800 |
| H | 2.41617000  | 2.33472000  | 1.68435800  | H                         | 7.32023200  | 0.15801600  | 1.57702100  |
| H | 0.69568700  | 2.57007000  | 1.32863300  | H                         | 6.90780800  | -0.07225300 | -0.85872100 |
| C | -2.12243200 | 3.37054400  | 1.26361800  | Sn                        | -0.00209900 | -0.03228800 | -1.70304500 |
| H | -2.78026400 | 4.23430400  | 1.41293800  |                           |             |             |             |
| H | -1.87810800 | 2.96378100  | 2.24963600  | <b>Int-1<sub>Ge</sub></b> |             |             |             |
| H | -1.19784500 | 3.73454800  | 0.80945200  | 97                        |             |             |             |
| C | -4.77217100 | 1.96429100  | 0.80921100  | Si                        | -1.70414300 | -1.29406000 | 0.02928200  |
| H | -5.38779200 | 1.33432200  | 0.16128500  | Si                        | -3.46297400 | -0.90006900 | -1.50451700 |
| H | -4.80970400 | 1.55081100  | 1.82120700  | Si                        | -0.76672800 | -3.42291900 | -0.35273300 |
| H | -5.22767600 | 2.96094200  | 0.83587100  | Si                        | -2.71431800 | -1.24962600 | 2.16474800  |
| C | 0.95018100  | 3.27728700  | -1.30058300 | N                         | 1.66089100  | 0.01043800  | 1.04921100  |
| H | -0.07430200 | 2.98773900  | -1.04532000 | N                         | 1.63694200  | -0.06870300 | -1.11437900 |
| H | 1.04871700  | 4.35257000  | -1.13359200 | C                         | 4.38958200  | -1.63089700 | 0.33820000  |
| H | 1.11750900  | 3.07321900  | -2.36240100 | H                         | 3.71535100  | -2.43069300 | 0.62272100  |
| C | -3.09354800 | 2.80017900  | -1.58372200 | C                         | 2.41497300  | -0.15188300 | -0.03663200 |
| H | -2.10275000 | 2.95187100  | -2.02186200 | C                         | 2.02126400  | 0.21349300  | 2.46660600  |
| H | -3.65128900 | 2.13198900  | -2.24608400 | C                         | 1.91427300  | -0.21258300 | -2.55531100 |
| H | -3.60634600 | 3.76871200  | -1.57525500 | C                         | 3.32089800  | 1.00395200  | 2.64617100  |
| C | 0.20970200  | 0.06329700  | 2.90875600  | H                         | 3.30928100  | 1.90719600  | 2.03138200  |
| H | 0.57039700  | -0.43593400 | 3.81488900  | H                         | 3.40071800  | 1.30244300  | 3.69464100  |
| H | 0.94565900  | -0.08375400 | 2.11378800  | H                         | 4.20462800  | 0.41457800  | 2.39888900  |
| H | 0.14564500  | 1.13560000  | 3.11497000  | C                         | 2.78239300  | -1.43931600 | -2.84636100 |
| C | -2.79355700 | 0.00187600  | 3.55273700  | H                         | 2.37600700  | -2.32651400 | -2.35242200 |
| H | -2.86473300 | 1.09338800  | 3.53207500  | H                         | 2.79667500  | -1.62038700 | -3.92420100 |
| C | 5.22947500  | 0.18192200  | 2.08005900  | H                         | 3.81278400  | -1.29686800 | -2.51566900 |
| C | 4.77174100  | -0.07203500 | -0.65187800 | C                         | 2.56679500  | 1.05945500  | -3.10543300 |
| H | -4.50122800 | -2.30909500 | 1.56010400  | H                         | 3.58167300  | 1.18245900  | -2.72559200 |
| H | -1.16845500 | -2.77116600 | 3.58778800  | H                         | 2.61851200  | 1.00195700  | -4.19607000 |



|   |             |             |             |    |             |             |             |
|---|-------------|-------------|-------------|----|-------------|-------------|-------------|
| H | 1.97511800  | 1.93703100  | -2.83142800 | H  | -3.86139100 | 0.94474200  | 1.89711300  |
| C | 3.88169900  | -0.38938100 | -0.04173700 | H  | -3.69097200 | 0.51020500  | 3.60914200  |
| C | -4.77826500 | 0.27102600  | -0.84342700 | C  | 0.95009000  | -3.53003200 | 0.41484700  |
| H | -5.59398700 | 0.32407800  | -1.57372900 | H  | 1.39520900  | -4.51051500 | 0.21219800  |
| H | -5.20318900 | -0.05968800 | 0.10721600  | H  | 1.59955200  | -2.76721200 | -0.02364200 |
| H | -4.36246800 | 1.27163100  | -0.71001500 | H  | 0.92665000  | -3.38267400 | 1.49768700  |
| C | 0.54000500  | -0.37863400 | -3.20509900 | C  | -1.88149900 | -4.71924900 | 0.44113700  |
| H | -0.08210900 | 0.50092000  | -3.00877700 | H  | -1.96751900 | -4.56818900 | 1.52095100  |
| H | 0.64041700  | -0.48584400 | -4.28729800 | C  | 5.76488300  | -1.84061200 | 0.33968900  |
| H | 0.02877600  | -1.26279100 | -2.81593800 | C  | 4.74524400  | 0.64134200  | -0.40893400 |
| C | -4.28007400 | -2.58928200 | -1.74783000 | H  | -3.60131500 | -3.32380100 | -2.18960700 |
| H | -5.13757300 | -2.48153800 | -2.42188000 | H  | -0.59358400 | -4.92258100 | -2.31388200 |
| H | -4.65104300 | -2.99546700 | -0.80237600 | H  | -1.39002900 | -3.42454200 | -2.80794400 |
| C | -2.90408800 | -0.26086200 | -3.18154600 | H  | 2.31818600  | -0.99967400 | 4.23408900  |
| H | -2.44957200 | 0.72948600  | -3.09338100 | H  | -2.88756900 | -4.70525300 | 0.01253700  |
| H | -2.19568100 | -0.93186400 | -3.67355400 | H  | -1.45888400 | -5.71615700 | 0.27391700  |
| H | -3.78498100 | -0.16886400 | -3.82706500 | H  | 6.16008400  | -2.80779900 | 0.62742000  |
| C | -0.58735500 | -3.83402900 | -2.18972700 | C  | 6.62950300  | -0.81188100 | -0.02423000 |
| H | 0.36285700  | -3.46503700 | -2.58476800 | H  | 4.34090100  | 1.60747300  | -0.68630300 |
| C | 2.12364100  | -1.14271900 | 3.16749200  | C  | 6.11922000  | 0.42981200  | -0.39506800 |
| H | 2.93819900  | -1.73614600 | 2.74523700  | H  | 7.70069400  | -0.97706900 | -0.01738500 |
| H | 1.19207600  | -1.70119000 | 3.05542100  | H  | 6.79037400  | 1.23430200  | -0.67212800 |
| C | -1.64123000 | -2.01291300 | 3.51696500  | Ge | 0.06305100  | 0.33132000  | -0.03620300 |
| H | -2.27986100 | -2.25930600 | 4.37284200  | O  | 0.13233200  | 4.48380800  | -0.12150300 |
| H | -1.15953800 | -2.93790800 | 3.18624000  | C  | 0.43521200  | 3.31682900  | -0.06705700 |
| H | -0.86709300 | -1.32996500 | 3.87285100  | O  | 1.71976500  | 2.91886000  | 0.09069500  |
| C | -4.27958600 | -2.29987400 | 2.06573700  | C  | 2.67782000  | 3.97364800  | 0.20054900  |
| H | -4.99261100 | -1.92824200 | 1.32660500  | H  | 2.69998200  | 4.56753900  | -0.71455100 |
| H | -4.05057900 | -3.34175300 | 1.82565700  | H  | 3.64305700  | 3.49799800  | 0.36035200  |
| H | -4.77515300 | -2.28388800 | 3.04320500  | H  | 2.43870000  | 4.62151700  | 1.04527100  |
| C | 0.87024900  | 1.02637800  | 3.06405300  | C  | -1.83328300 | 2.29123400  | -0.33289000 |
| H | -0.08788600 | 0.52714500  | 2.89217900  | C  | -0.50393100 | 2.16704100  | -0.14731700 |
| H | 1.00365000  | 1.13449800  | 4.14254400  | C  | -2.48012200 | 3.56421600  | -0.54012700 |
| H | 0.82750600  | 2.02264300  | 2.61443900  | O  | -2.94415400 | 4.10161000  | 0.61760000  |
| C | -3.18424700 | 0.51039400  | 2.63744400  | O  | -2.73784500 | 4.05703400  | -1.62642300 |
| H | -2.31192100 | 1.16581200  | 2.70861800  | C  | -3.66281700 | 5.32389100  | 0.48063800  |

|                           |             |             |             |   |             |             |             |
|---------------------------|-------------|-------------|-------------|---|-------------|-------------|-------------|
| H                         | -3.02955100 | 6.09972500  | 0.04616300  | H | 0.91503500  | -0.70848800 | -4.33787000 |
| H                         | -3.96012400 | 5.60982900  | 1.48825600  | H | 0.16098000  | -1.27443500 | -2.83806400 |
| H                         | -4.54790000 | 5.19140900  | -0.14416100 | C | -4.31042300 | -2.96560100 | -1.69054300 |
| <b>Int-1<sub>Sn</sub></b> |             |             |             | H | -5.15878000 | -2.91193900 | -2.38200100 |
| 97                        |             |             |             | H | -4.68856900 | -3.31768400 | -0.72615900 |
| Si                        | -1.79225900 | -1.50768000 | 0.05779200  | C | -2.84360200 | -0.71736300 | -3.20109700 |
| Si                        | -3.51644800 | -1.26068200 | -1.53197000 | H | -2.38961800 | 0.27582700  | -3.13278500 |
| Si                        | -0.68574200 | -3.56574100 | -0.20520000 | H | -2.09705800 | -1.41626700 | -3.58859800 |
| Si                        | -2.75377100 | -1.35894300 | 2.20392000  | H | -3.66288200 | -0.66110100 | -3.92623500 |
| N                         | 1.75697600  | 0.12869000  | 1.03255500  | C | -0.45795500 | -4.04318300 | -2.01393400 |
| N                         | 1.76953000  | -0.06219200 | -1.16007200 | H | 0.27985700  | -3.41440300 | -2.51687200 |
| C                         | 4.44720400  | -1.57441600 | 0.43009300  | C | 2.30154500  | -0.92518400 | 3.19226100  |
| H                         | 3.74860600  | -2.35159100 | 0.71961100  | H | 3.14517500  | -1.49650700 | 2.79913700  |
| C                         | 2.50345300  | -0.08391600 | -0.04816200 | H | 1.39881700  | -1.53424200 | 3.10415500  |
| C                         | 2.13393000  | 0.39378500  | 2.43301100  | C | -1.59082200 | -1.99968500 | 3.54070700  |
| C                         | 2.11720400  | -0.36776200 | -2.55976500 | H | -2.13946800 | -2.09142500 | 4.48479900  |
| C                         | 3.39723400  | 1.24998000  | 2.57233300  | H | -1.18656400 | -2.98550200 | 3.29290800  |
| H                         | 3.34349300  | 2.12187600  | 1.91507600  | H | -0.75443100 | -1.31796400 | 3.71153200  |
| H                         | 3.46996800  | 1.60227300  | 3.60468500  | C | -4.29627300 | -2.44260700 | 2.20361200  |
| H                         | 4.30519100  | 0.68955300  | 2.34636000  | H | -5.04165900 | -2.09338000 | 1.48460000  |
| C                         | 2.88054100  | -1.69006900 | -2.69280400 | H | -4.05598500 | -3.48361700 | 1.96959000  |
| H                         | 2.37510000  | -2.48690700 | -2.13930200 | H | -4.75606400 | -2.42016000 | 3.19796500  |
| H                         | 2.92579600  | -1.97769900 | -3.74665700 | C | 0.95267300  | 1.17543000  | 3.01780500  |
| H                         | 3.90431200  | -1.60543600 | -2.32446800 | H | 0.01776100  | 0.61840900  | 2.88595800  |
| C                         | 2.91358600  | 0.77624200  | -3.19633000 | H | 1.09314500  | 1.34357000  | 4.08774800  |
| H                         | 3.91865200  | 0.84374300  | -2.77911700 | H | 0.85204800  | 2.14645000  | 2.52232100  |
| H                         | 3.00642300  | 0.60395200  | -4.27219600 | C | -3.22527100 | 0.42406700  | 2.56763400  |
| H                         | 2.39944200  | 1.72863300  | -3.04188400 | H | -2.34609400 | 1.07474600  | 2.60355000  |
| C                         | 3.97211600  | -0.33908300 | -0.00957600 | H | -3.89447500 | 0.81982500  | 1.79859800  |
| C                         | -4.83366800 | -0.04836500 | -0.96175600 | H | -3.73530200 | 0.49053600  | 3.53506000  |
| H                         | -5.61201100 | 0.02153700  | -1.73009400 | C | 1.00336800  | -3.47524800 | 0.61998600  |
| H                         | -5.30927900 | -0.37175700 | -0.03213300 | H | 1.58076900  | -4.38515800 | 0.42348000  |
| H                         | -4.40973100 | 0.94655200  | -0.80785800 | H | 1.56564600  | -2.62096700 | 0.23297900  |
| C                         | 0.77006900  | -0.48081500 | -3.27957500 | H | 0.90978000  | -3.35687700 | 1.70329600  |
| H                         | 0.21919100  | 0.46416600  | -3.20995800 | C | -1.73586400 | -4.89174500 | 0.62548800  |
|                           |             |             |             | H | -1.86937900 | -4.69218600 | 1.69247200  |

|                |             |             |             |    |             |             |             |
|----------------|-------------|-------------|-------------|----|-------------|-------------|-------------|
| C              | 5.81717300  | -1.81047900 | 0.48289900  | Si | 5.14184300  | -4.05900100 | 1.12134500  |
| C              | 4.86832700  | 0.65860200  | -0.39003700 | Si | 7.16382500  | -2.06899400 | -1.19429700 |
| H              | -3.61174600 | -3.71246400 | -2.07679200 | Si | 7.04641000  | -1.25266400 | 2.58302800  |
| H              | -0.09961200 | -5.07758500 | -2.06585900 | O  | 4.06728500  | 3.16513000  | 0.82773200  |
| H              | -1.39305100 | -3.98731400 | -2.57743900 | O  | 2.08224400  | 2.14591700  | 1.01238500  |
| H              | 2.48543600  | -0.72760000 | 4.25215000  | O  | 5.49418600  | 1.80344700  | -1.61485900 |
| H              | -2.72569800 | -4.96258400 | 0.16497900  | O  | 6.98721300  | 2.18113200  | 0.02058000  |
| H              | -1.24873800 | -5.86776700 | 0.52362500  | N  | 1.58374700  | -1.33634000 | 1.80405800  |
| H              | 6.18396000  | -2.77359800 | 0.81834900  | N  | 2.00141700  | -1.24417300 | -0.32139200 |
| C              | 6.71286100  | -0.81263200 | 0.10771000  | C  | 4.05011500  | 0.81458200  | 0.88509700  |
| H              | 4.49430400  | 1.62187400  | -0.71742900 | C  | -1.23701100 | -0.62588100 | -0.02354200 |
| C              | 6.23733200  | 0.42214000  | -0.32674400 | H  | -0.85843800 | 0.39013800  | -0.02128800 |
| H              | 7.78004300  | -0.99667200 | 0.15432000  | C  | 1.04699100  | -1.42174900 | 0.58520700  |
| H              | 6.93194800  | 1.20273100  | -0.61441500 | C  | 3.28720300  | 2.07963000  | 0.91589200  |
| O              | -0.03559600 | 4.69713700  | -0.07180800 | C  | 5.24530700  | 0.56814700  | 0.33571100  |
| C              | 0.24893100  | 3.52529400  | -0.12803300 | C  | 0.98258000  | -1.42348600 | 3.14749100  |
| O              | 1.53022400  | 3.09416600  | -0.07522000 | C  | 1.96192200  | -1.18554100 | -1.79484100 |
| C              | 2.52267800  | 4.11251000  | 0.05665900  | C  | 6.00335700  | 1.60198700  | -0.38077000 |
| H              | 2.45097600  | 4.82642800  | -0.76495600 | C  | 0.67533600  | -2.88019400 | 3.50707600  |
| H              | 3.48473800  | 3.60570600  | 0.02600900  | H  | 1.56471600  | -3.50334900 | 3.38389800  |
| H              | 2.40585800  | 4.64022900  | 1.00505200  | H  | 0.34824900  | -2.94398200 | 4.54852900  |
| C              | -2.02826100 | 2.52451600  | -0.45437100 | H  | -0.12229500 | -3.27841300 | 2.87710600  |
| C              | -0.70448500 | 2.39296800  | -0.25515500 | C  | 1.53554400  | 0.21627300  | -2.23901600 |
| C              | -2.66242600 | 3.81434500  | -0.61515900 | H  | 2.19127100  | 0.96982800  | -1.79478900 |
| O              | -3.14919300 | 4.29411700  | 0.55788400  | H  | 1.59673100  | 0.29697500  | -3.32786000 |
| O              | -2.88473100 | 4.36910600  | -1.67789000 | H  | 0.50755900  | 0.42576300  | -1.93547100 |
| C              | -3.84107800 | 5.53626100  | 0.47095300  | C  | 1.04337100  | -2.24927800 | -2.40490400 |
| H              | -3.18393700 | 6.32020700  | 0.08981600  | H  | -0.01265300 | -2.03516000 | -2.23729900 |
| H              | -4.15342200 | 5.77572000  | 1.48606300  | H  | 1.21166800  | -2.27511400 | -3.48453300 |
| H              | -4.71539500 | 5.45452700  | -0.17728500 | H  | 1.27405100  | -3.23854800 | -1.99912100 |
| Sn             | -0.06060400 | 0.38830400  | -0.10826300 | C  | -0.38684200 | -1.68567400 | 0.28883100  |
|                |             |             |             | C  | 4.49318400  | -4.16403000 | 2.90303700  |
| <b>Ts-1 Ge</b> |             |             |             | H  | 5.30198600  | -4.15706500 | 3.63873000  |
| 97             |             |             |             | H  | 3.82823100  | -3.32558500 | 3.13397400  |
| Ge             | 3.38113700  | -0.99927600 | 1.06611200  | H  | 3.92047700  | -5.08758500 | 3.04527400  |
| Si             | 5.76524700  | -1.78922000 | 0.68419600  | C  | 3.39549600  | -1.45455700 | -2.26043100 |

|   |             |             |             |                |             |             |             |
|---|-------------|-------------|-------------|----------------|-------------|-------------|-------------|
| H | 3.72759000  | -2.43655700 | -1.91342000 | H              | 6.50601500  | -0.45163400 | 4.87434000  |
| H | 3.43933000  | -1.43792800 | -3.35199100 | H              | 5.26393400  | 0.07857800  | 3.72939800  |
| H | 4.08422000  | -0.69208900 | -1.88172000 | C              | 7.63196400  | -0.51189700 | -2.14469200 |
| C | 3.39006200  | 4.42481800  | 0.81452700  | H              | 8.38587300  | -0.77148500 | -2.89665800 |
| H | 2.81965000  | 4.56213800  | 1.73401300  | H              | 6.76899500  | -0.08760800 | -2.66340600 |
| H | 4.17056600  | 5.17863800  | 0.73984500  | H              | 8.05691300  | 0.25456100  | -1.49100700 |
| H | 2.71929100  | 4.48866300  | -0.04330800 | C              | 8.76091000  | -2.82663100 | -0.51845800 |
| C | 6.45697400  | -5.40914300 | 0.91803000  | H              | 9.42889700  | -3.07396000 | -1.35143000 |
| H | 6.03542400  | -6.38312700 | 1.19198700  | C              | -2.57189500 | -0.87905500 | -0.32021500 |
| H | 7.32499700  | -5.22912400 | 1.55864400  | C              | -0.86735500 | -2.99405800 | 0.30634600  |
| C | 3.66498900  | -4.56960100 | 0.03931500  | H              | 6.81041700  | -5.47915300 | -0.11491000 |
| H | 2.82003900  | -3.88298400 | 0.16579600  | H              | 7.27577900  | -3.60751800 | -3.12794100 |
| H | 3.91618600  | -4.60009500 | -1.02497500 | H              | 6.06279100  | -4.19662300 | -1.98593900 |
| H | 3.32206600  | -5.56928400 | 0.33024800  | H              | 5.69811100  | 2.74006100  | -3.39135200 |
| C | 6.46886000  | -3.29608500 | -2.45469700 | H              | -0.57471700 | -0.51699000 | 4.32062600  |
| H | 5.68344900  | -2.84664900 | -3.06738100 | H              | 9.28784600  | -2.12664200 | 0.13666100  |
| C | 6.20334500  | 2.74044800  | -2.42746800 | H              | 8.57369200  | -3.74494300 | 0.04438700  |
| H | 7.24480000  | 2.43785700  | -2.54805800 | H              | -3.23482400 | -0.05561100 | -0.55881100 |
| H | 6.16426500  | 3.73670600  | -1.98368800 | C              | -3.05433200 | -2.18554400 | -0.30864300 |
| C | -0.28471400 | -0.57075900 | 3.26803900  | H              | -0.19665300 | -3.81408100 | 0.53899400  |
| H | -1.12024500 | -0.99946800 | 2.71317800  | C              | -2.20252400 | -3.24153700 | 0.00488700  |
| H | -0.10338900 | 0.44506100  | 2.90821100  | H              | -4.09454600 | -2.38065400 | -0.54272000 |
| C | 8.24962600  | 0.15583900  | 2.25651900  | H              | -2.57585900 | -4.25889300 | 0.01187600  |
| H | 8.86010700  | 0.32460000  | 3.15111700  |                |             |             |             |
| H | 8.92556800  | -0.07637700 | 1.42776300  |                |             |             |             |
| H | 7.73137800  | 1.08296900  | 2.00508200  | <b>Ts-1 Sn</b> |             |             |             |
| C | 8.07117400  | -2.73939700 | 3.14324700  | 97             |             |             |             |
| H | 7.45556600  | -3.60245200 | 3.40655400  | Si             | 5.96429200  | -1.84459600 | 0.70534300  |
| H | 8.78229800  | -3.05067900 | 2.37345900  | Si             | 5.34523200  | -4.09362100 | 1.20192400  |
| H | 8.64694600  | -2.45816800 | 4.03268300  | Si             | 7.29371600  | -2.11967400 | -1.21580500 |
| C | 2.04707700  | -0.87342100 | 4.09943300  | Si             | 7.18380000  | -1.19489400 | 2.60515500  |
| H | 2.28332000  | 0.16685400  | 3.85503100  | O              | 4.21867100  | 3.28654000  | 0.69824800  |
| H | 1.68809200  | -0.91391100 | 5.12982000  | O              | 2.26356300  | 2.30773500  | 1.18074400  |
| H | 2.96451000  | -1.46628600 | 4.03835800  | O              | 5.58313900  | 1.79373600  | -1.73150800 |
| C | 5.91092800  | -0.75934500 | 4.00718700  | O              | 7.12354100  | 2.16872500  | -0.13978700 |
| H | 5.27930000  | -1.59759400 | 4.31474200  | N              | 1.37944200  | -1.38867300 | 1.85179600  |
|   |             |             |             | N              | 1.85979800  | -1.29991000 | -0.29753000 |

|   |             |             |             |   |             |             |             |
|---|-------------|-------------|-------------|---|-------------|-------------|-------------|
| C | 4.18432900  | 0.93939500  | 0.87505300  | H | 7.56402500  | -5.17343600 | 1.68406500  |
| C | -1.34818600 | -0.51257400 | 0.05054000  | C | 3.91205600  | -4.64789000 | 0.08777400  |
| H | -0.92497900 | 0.48322000  | 0.12518500  | H | 3.03069000  | -4.00652700 | 0.20684100  |
| C | 0.89950800  | -1.44143500 | 0.60918000  | H | 4.18580900  | -4.64537000 | -0.97123800 |
| C | 3.44658900  | 2.21737100  | 0.93638400  | H | 3.61148800  | -5.66787400 | 0.35363500  |
| C | 5.32945300  | 0.64328700  | 0.26944300  | C | 6.54148000  | -3.38163800 | -2.40130700 |
| C | 0.73121400  | -1.60185100 | 3.15533000  | H | 5.60233700  | -3.02342900 | -2.83186100 |
| C | 1.79894400  | -1.16283000 | -1.76310900 | C | 6.30591800  | 2.68186400  | -2.58496900 |
| C | 6.10898200  | 1.61373200  | -0.50061300 | H | 7.33276000  | 2.33855900  | -2.72175300 |
| C | 0.52159900  | -3.09907900 | 3.40582600  | H | 6.31363600  | 3.69070200  | -2.16871800 |
| H | 1.46557300  | -3.64039900 | 3.29154900  | C | -0.59448500 | -0.84576100 | 3.30331500  |
| H | 0.14916600  | -3.26326300 | 4.42094800  | H | -1.39399700 | -1.29561200 | 2.71353900  |
| H | -0.20585600 | -3.51444200 | 2.70543100  | H | -0.47728500 | 0.19865600  | 3.00194000  |
| C | 1.45817200  | 0.28388600  | -2.13409500 | C | 8.32302400  | 0.26106200  | 2.27161200  |
| H | 2.16640800  | 0.97241100  | -1.66428300 | H | 8.88465600  | 0.50128400  | 3.18155400  |
| H | 1.51042200  | 0.41782400  | -3.21836600 | H | 9.04495100  | 0.02901500  | 1.48249700  |
| H | 0.44963400  | 0.54268800  | -1.80383800 | H | 7.76799100  | 1.14661000  | 1.95613100  |
| C | 0.81600600  | -2.13135600 | -2.43115400 | C | 8.25550800  | -2.63129100 | 3.20392100  |
| H | -0.22475000 | -1.85404400 | -2.26093900 | H | 7.66448900  | -3.50644800 | 3.48494400  |
| H | 0.99247500  | -2.11855100 | -3.50990700 | H | 8.97570200  | -2.93774100 | 2.43976100  |
| H | 0.97261500  | -3.15230000 | -2.07155500 | H | 8.82271300  | -2.31469300 | 4.08675400  |
| C | -0.54422800 | -1.62762700 | 0.28235500  | C | 1.72517600  | -1.05363400 | 4.18499400  |
| C | 4.66450500  | -4.18528300 | 2.97130600  | H | 1.90433600  | 0.01261200  | 4.01498500  |
| H | 5.45203600  | -4.07966300 | 3.72250900  | H | 1.33913000  | -1.18423900 | 5.19810900  |
| H | 3.91022400  | -3.41527800 | 3.16935400  | H | 2.68125500  | -1.58573000 | 4.12013900  |
| H | 4.18204700  | -5.15692000 | 3.12807000  | C | 5.98150000  | -0.73343300 | 3.98571600  |
| C | 3.21301600  | -1.49222600 | -2.25630400 | H | 5.33560200  | -1.57669200 | 4.24851600  |
| H | 3.48751900  | -2.50958800 | -1.96259400 | H | 6.53385900  | -0.44124100 | 4.88585200  |
| H | 3.26212200  | -1.41780600 | -3.34535000 | H | 5.34901900  | 0.11087900  | 3.69332700  |
| H | 3.94678300  | -0.79384900 | -1.83832400 | C | 7.68090500  | -0.57346200 | -2.21241400 |
| C | 3.55741700  | 4.55448600  | 0.71792600  | H | 8.40457300  | -0.83312500 | -2.99345400 |
| H | 3.10828000  | 4.73694200  | 1.69502900  | H | 6.78560500  | -0.17793400 | -2.69763500 |
| H | 4.32936700  | 5.29339200  | 0.51488500  | H | 8.11861100  | 0.21338700  | -1.59291200 |
| H | 2.78468900  | 4.59425800  | -0.05103600 | C | 8.92604300  | -2.82805400 | -0.57693000 |
| C | 6.70336500  | -5.40407000 | 1.05010900  | H | 9.56459700  | -3.10737200 | -1.42275500 |
| H | 6.31195500  | -6.38023800 | 1.35814100  | C | -2.69330700 | -0.68376800 | -0.25939200 |

|                        |             |             |             |   |             |             |             |
|------------------------|-------------|-------------|-------------|---|-------------|-------------|-------------|
| C                      | -1.08371300 | -2.91015300 | 0.20539200  | C | 1.73099700  | 2.28640200  | -0.66689100 |
| H                      | 7.05903400  | -5.49926300 | 0.02018900  | C | -3.42072800 | -0.86148400 | 3.27992800  |
| H                      | 7.24018800  | -3.55809800 | -3.22713200 | H | -2.73018500 | -1.70972700 | 3.27737000  |
| H                      | 6.35159000  | -4.34271600 | -1.91621600 | H | -3.62032300 | -0.58066200 | 4.31803000  |
| H                      | 5.77802500  | 2.67427700  | -3.53667900 | H | -4.36302800 | -1.17613100 | 2.82421800  |
| H                      | -0.89936300 | -0.86900600 | 4.35295900  | C | -3.76294500 | -0.77649000 | -2.87459100 |
| H                      | 9.46823700  | -2.08971300 | 0.02169500  | H | -3.53052700 | 0.28855200  | -2.81128600 |
| H                      | 8.77344300  | -3.71945100 | 0.03730500  | H | -3.74251700 | -1.07699700 | -3.92570200 |
| H                      | -3.31879500 | 0.18334300  | -0.43720500 | H | -4.77277900 | -0.94746900 | -2.49862100 |
| C                      | -3.23482500 | -1.96463300 | -0.33741000 | C | -3.14142000 | -3.06306100 | -2.03734600 |
| H                      | -0.45001800 | -3.77413300 | 0.37356700  | H | -4.08303500 | -3.15540200 | -1.48931200 |
| C                      | -2.42963900 | -3.07675300 | -0.10455900 | H | -3.28288400 | -3.47426600 | -3.04084500 |
| H                      | -4.28335200 | -2.09590000 | -0.57896300 | H | -2.37975500 | -3.65587100 | -1.52257800 |
| H                      | -2.84769100 | -4.07474000 | -0.16783100 | C | -4.67092000 | -0.22709000 | -0.00871200 |
| Sn                     | 3.43063000  | -1.03804600 | 1.19696400  | C | 1.97755800  | -3.18863100 | 1.95679600  |
| <b>3<sub>cis</sub></b> |             |             |             | H | 1.94792100  | -4.28453900 | 1.94964600  |
| 97                     |             |             |             | H | 2.65803900  | -2.88404500 | 2.75620400  |
| Ge                     | -0.84796800 | -1.06937800 | 0.44065000  | H | 0.97698800  | -2.82687500 | 2.19690000  |
| Si                     | 2.81504800  | -0.24735300 | 0.05692100  | C | -1.37849900 | -1.48235700 | -2.86395400 |
| Si                     | 2.57997400  | -2.59665800 | 0.26928500  | H | -0.59138300 | -2.03042100 | -2.33656100 |
| Si                     | 4.37177100  | 0.05845100  | -1.69355500 | H | -1.46934300 | -1.90734100 | -3.86655200 |
| Si                     | 3.74742700  | 0.49837100  | 2.09144900  | H | -1.08221400 | -0.43382100 | -2.94436200 |
| O                      | -0.91704600 | 2.75217800  | 0.22468000  | C | -1.79493200 | 3.84661200  | -0.05184200 |
| O                      | -1.78985500 | 1.68734000  | -1.54272100 | H | -2.83574000 | 3.51960000  | -0.04538400 |
| O                      | 1.19918400  | 2.75425800  | -1.80206500 | H | -1.62346600 | 4.57396200  | 0.73883200  |
| O                      | 2.46893800  | 2.93707700  | 0.03157000  | H | -1.56333600 | 4.28255500  | -1.02553100 |
| N                      | -2.44549500 | -0.08590700 | 1.15132100  | C | 4.34451600  | -3.26304100 | 0.09408900  |
| N                      | -2.44937100 | -1.10098300 | -0.75886100 | H | 4.32619700  | -4.33497800 | 0.32298200  |
| C                      | -0.01986300 | 0.63682200  | -0.30154800 | H | 5.04903700  | -2.78992000 | 0.78171400  |
| C                      | -5.11195000 | 1.01811600  | -0.45723800 | C | 1.57998900  | -3.43652600 | -1.09453200 |
| H                      | -4.38147500 | 1.78408200  | -0.69701700 | H | 0.51373300  | -3.46742800 | -0.86142500 |
| C                      | -3.20859700 | -0.47426500 | 0.12453100  | H | 1.71027200  | -2.94514100 | -2.06245800 |
| C                      | -0.99247400 | 1.71945000  | -0.63645400 | H | 1.93028400  | -4.47028200 | -1.19395900 |
| C                      | 1.30404600  | 0.88123100  | -0.34761600 | C | 3.96572700  | -1.08681000 | -3.13826000 |
| C                      | -2.81482700 | 0.32050800  | 2.51596200  | H | 2.95928700  | -0.88094900 | -3.51702200 |
| C                      | -2.71188000 | -1.59461800 | -2.11821600 | C | 1.48406200  | 4.12644100  | -2.09742800 |

|   |             |             |             |                        |             |             |             |
|---|-------------|-------------|-------------|------------------------|-------------|-------------|-------------|
| H | 2.55715700  | 4.27266400  | -2.22938400 | H                      | -6.81525900 | 2.21947400  | -0.96796400 |
| H | 1.12699300  | 4.76826600  | -1.29053400 | C                      | -7.39310700 | 0.25048200  | -0.31733700 |
| C | -3.77764400 | 1.51189000  | 2.53381900  | H                      | -5.23958700 | -2.20145300 | 0.62638800  |
| H | -4.77970800 | 1.23616900  | 2.20308100  | C                      | -6.95187100 | -0.99071100 | 0.13160100  |
| H | -3.40159400 | 2.31526700  | 1.89441600  | H                      | -8.45416500 | 0.43639900  | -0.43886500 |
| C | 4.68270100  | 2.13142200  | 2.01485400  | H                      | -7.66670300 | -1.77239500 | 0.36124400  |
| H | 5.25753000  | 2.25824500  | 2.93910700  |                        |             |             |             |
| H | 5.38699400  | 2.15213500  | 1.17775800  | <b>4<sub>cis</sub></b> |             |             |             |
| H | 4.00266800  | 2.97517700  | 1.90135500  | 97                     |             |             |             |
| C | 4.99854900  | -0.77203300 | 2.72037800  | Si                     | 2.99555400  | -0.16914900 | 0.05502900  |
| H | 4.57475900  | -1.76786900 | 2.86433600  | Si                     | 2.76152200  | -2.51766400 | 0.15669400  |
| H | 5.84858300  | -0.85870700 | 2.03632200  | Si                     | 4.59686600  | 0.19778100  | -1.63707200 |
| H | 5.38746800  | -0.43265800 | 3.68720600  | Si                     | 3.78574000  | 0.61434000  | 2.12331300  |
| C | -1.49884700 | 0.74144900  | 3.17599400  | O                      | -0.84947800 | 2.67380900  | -0.07135700 |
| H | -1.04701800 | 1.56835900  | 2.62129000  | O                      | -1.61690200 | 1.44575800  | -1.78302900 |
| H | -1.67282100 | 1.05933500  | 4.20666400  | O                      | 1.35890100  | 2.71400100  | -1.90866400 |
| H | -0.79153100 | -0.09424800 | 3.19591400  | O                      | 2.46825800  | 2.97877300  | 0.01756900  |
| C | 2.31652100  | 0.62458600  | 3.31287800  | N                      | -2.49756600 | -0.02826900 | 1.14861600  |
| H | 1.57880300  | 1.35496400  | 2.96670400  | N                      | -2.63383600 | -1.24737800 | -0.67904400 |
| H | 1.81289600  | -0.34183500 | 3.41916900  | C                      | 0.12778500  | 0.54678200  | -0.40983800 |
| H | 2.66569200  | 0.93633100  | 4.30313700  | C                      | -4.95308600 | 1.18933500  | -0.70198900 |
| C | 4.38324000  | 1.81656800  | -2.37786800 | H                      | -4.11998100 | 1.75238800  | -1.10937200 |
| H | 5.19033400  | 1.89745300  | -3.11476000 | C                      | -3.28020000 | -0.44247800 | 0.15142900  |
| H | 3.44615000  | 2.05819000  | -2.88679700 | C                      | -0.86276700 | 1.57091300  | -0.84736400 |
| H | 4.55783200  | 2.56093500  | -1.59713700 | C                      | 1.43904800  | 0.86449000  | -0.41257700 |
| C | 6.11181100  | -0.29448400 | -1.05390300 | C                      | -2.83992700 | 0.63677900  | 2.41415300  |
| H | 6.38629700  | 0.41790800  | -0.26964600 | C                      | -3.07032500 | -1.87811500 | -1.93293700 |
| C | -6.47200700 | 1.25452000  | -0.61306500 | C                      | 1.81729600  | 2.28548500  | -0.72681400 |
| C | -5.58857400 | -1.23360500 | 0.28277100  | C                      | -3.55583600 | -0.34273200 | 3.35166300  |
| H | 4.72948000  | -3.15120000 | -0.92286800 | H                      | -2.95400800 | -1.24606400 | 3.48791500  |
| H | 4.67180800  | -0.92053700 | -3.95930700 | H                      | -3.71814900 | 0.11610600  | 4.33146200  |
| H | 4.01265200  | -2.14387700 | -2.86453400 | H                      | -4.52814300 | -0.63014800 | 2.94430900  |
| H | 0.95532100  | 4.34641400  | -3.02206600 | C                      | -3.83122400 | -0.93367000 | -2.87242300 |
| H | -3.85425200 | 1.89333500  | 3.55568600  | H                      | -3.31014100 | 0.02318700  | -2.94648300 |
| H | 6.21929900  | -1.30324000 | -0.64977500 | H                      | -3.87880300 | -1.38736300 | -3.86646700 |
| H | 6.83253900  | -0.18109700 | -1.87139400 | H                      | -4.85499000 | -0.75940900 | -2.53907800 |

|   |             |             |             |    |             |             |             |
|---|-------------|-------------|-------------|----|-------------|-------------|-------------|
| C | -3.92209400 | -3.11587900 | -1.62835400 | C  | 4.81883100  | -0.75599400 | 2.91324400  |
| H | -4.85268000 | -2.83237100 | -1.13099800 | H  | 4.24828500  | -1.67923500 | 3.04729000  |
| H | -4.17576900 | -3.63965100 | -2.55481400 | H  | 5.69728200  | -0.98371400 | 2.30067500  |
| H | -3.37484500 | -3.80474300 | -0.97850200 | H  | 5.17661000  | -0.43643700 | 3.89828400  |
| C | -4.69789300 | -0.00481500 | -0.02620600 | C  | -1.49155200 | 1.03037500  | 3.02714000  |
| C | 2.13812500  | -3.17093500 | 1.82711100  | H  | -0.95487400 | 1.70454400  | 2.35371400  |
| H | 2.96756000  | -3.65124100 | 2.35611300  | H  | -1.63338400 | 1.52898900  | 3.98905500  |
| H | 1.73014900  | -2.39115400 | 2.47355300  | H  | -0.87526300 | 0.14098800  | 3.19963700  |
| H | 1.35444000  | -3.92001400 | 1.68308200  | C  | 2.27276200  | 0.96909400  | 3.18880600  |
| C | -1.77709300 | -2.31460800 | -2.62803700 | H  | 1.66221400  | 1.75333600  | 2.73152100  |
| H | -1.21209300 | -3.00240700 | -1.99014700 | H  | 1.65285100  | 0.07283000  | 3.29384800  |
| H | -1.99715200 | -2.83005200 | -3.56584700 | H  | 2.56130400  | 1.29990900  | 4.19218300  |
| H | -1.15431900 | -1.44133500 | -2.84561900 | C  | 4.66961300  | 1.99070400  | -2.21754400 |
| C | -1.68034200 | 3.74874000  | -0.51616200 | H  | 5.52194300  | 2.10635000  | -2.89654800 |
| H | -2.72742000 | 3.44662800  | -0.55156700 | H  | 3.76801800  | 2.27062600  | -2.76865700 |
| H | -1.54600800 | 4.55020900  | 0.20757500  | H  | 4.79874800  | 2.68634600  | -1.38438700 |
| H | -1.37079100 | 4.07831600  | -1.51007300 | C  | 6.31084400  | -0.24207900 | -0.98030000 |
| C | 4.49051800  | -3.25880800 | -0.03647600 | H  | 6.61001200  | 0.45304800  | -0.19020400 |
| H | 4.40658800  | -4.34847300 | 0.05101100  | C  | -6.26010200 | 1.63008800  | -0.86484600 |
| H | 5.16851900  | -2.91605400 | 0.75058700  | C  | -5.75418200 | -0.75960700 | 0.47742100  |
| C | 1.72458300  | -3.13308300 | -1.30811200 | H  | 4.94267200  | -3.03798400 | -1.00602700 |
| H | 1.12983400  | -2.33875300 | -1.76776700 | H  | 4.87763800  | -0.65569500 | -3.95886300 |
| H | 2.38915400  | -3.52794900 | -2.08334400 | H  | 4.23410600  | -1.93506100 | -2.92018200 |
| H | 1.04757900  | -3.93868500 | -1.00855100 | H  | 1.13552600  | 4.28283200  | -3.16342600 |
| C | 4.18099800  | -0.86563100 | -3.13988000 | H  | -3.70830000 | 2.44526400  | 3.19462300  |
| H | 3.16920700  | -0.64582200 | -3.49587000 | H  | 6.36712100  | -1.25587700 | -0.57878800 |
| C | 1.59235700  | 4.09853800  | -2.19366400 | H  | 7.04607100  | -0.15956800 | -1.78853400 |
| H | 2.66271400  | 4.30569100  | -2.23214800 | H  | -6.45586500 | 2.55665600  | -1.39247700 |
| H | 1.13064000  | 4.72386500  | -1.42779200 | C  | -7.31830600 | 0.87951000  | -0.35360700 |
| C | -3.68272100 | 1.90628800  | 2.24334400  | H  | -5.55580700 | -1.69053500 | 0.99747200  |
| H | -4.71164900 | 1.68609800  | 1.95671600  | C  | -7.06479400 | -0.31465400 | 0.31386200  |
| H | -3.23763900 | 2.56217900  | 1.49104600  | H  | -8.33838000 | 1.22422400  | -0.47935000 |
| C | 4.87695400  | 2.14401200  | 2.01701500  | H  | -7.88551600 | -0.90262600 | 0.70847600  |
| H | 5.20489200  | 2.43121800  | 3.02241500  | Sn | -0.78127100 | -1.28438900 | 0.53228000  |
| H | 5.77267900  | 1.95355200  | 1.41874900  |    |             |             |             |
| H | 4.33557000  | 2.98072700  | 1.57355500  |    |             |             |             |



**Ts-2 Ge**

|    |           |           |           |   |           |           |           |
|----|-----------|-----------|-----------|---|-----------|-----------|-----------|
| Ge | -2.289000 | -0.389000 | 1.341000  | H | -1.734000 | 3.628000  | 4.956000  |
| Si | 1.079000  | 2.226000  | 1.770000  | H | -1.049000 | 4.616000  | 3.653000  |
| Si | 0.278000  | 2.550000  | 3.954000  | H | -2.035000 | 3.204000  | 3.256000  |
| Si | 2.646000  | 0.451000  | 1.731000  | C | -2.668000 | -0.740000 | -1.983000 |
| Si | 1.971000  | 4.169000  | 0.726000  | H | -1.963000 | -1.417000 | -1.490000 |
| O  | -2.105000 | 3.633000  | -0.147000 | H | -2.724000 | -1.012000 | -3.039000 |
| O  | -3.919000 | 2.432000  | 0.469000  | H | -2.286000 | 0.283000  | -1.902000 |
| O  | 0.240000  | -0.151000 | -0.792000 | C | -3.003000 | 4.662000  | -0.527000 |
| O  | 0.548000  | 1.916000  | -1.619000 | H | -3.566000 | 5.040000  | 0.330000  |
| N  | -4.058000 | 0.060000  | 2.158000  | H | -2.380000 | 5.459000  | -0.935000 |
| N  | -3.847000 | -0.537000 | 0.085000  | H | -3.707000 | 4.321000  | -1.289000 |
| C  | -1.673000 | 1.620000  | 0.823000  | C | 1.588000  | 3.422000  | 4.993000  |
| C  | -6.809000 | 1.062000  | 0.622000  | H | 1.314000  | 3.344000  | 6.051000  |
| H  | -6.190000 | 1.949000  | 0.550000  | H | 1.671000  | 4.483000  | 4.747000  |
| C  | -4.715000 | -0.213000 | 1.035000  | C | 0.038000  | 0.840000  | 4.717000  |
| C  | -2.692000 | 2.493000  | 0.405000  | H | -0.480000 | 0.146000  | 4.052000  |
| C  | -0.318000 | 1.663000  | 0.598000  | H | 1.020000  | 0.414000  | 4.950000  |
| C  | -4.550000 | 0.457000  | 3.486000  | H | -0.527000 | 0.907000  | 5.653000  |
| C  | -4.051000 | -0.846000 | -1.338000 | C | 1.774000  | -1.175000 | 2.107000  |
| C  | 0.197000  | 1.178000  | -0.733000 | H | 1.030000  | -1.401000 | 1.339000  |
| C  | -5.634000 | -0.488000 | 4.017000  | C | 0.677000  | -0.722000 | -2.036000 |
| H  | -5.303000 | -1.528000 | 3.953000  | H | 1.688000  | -0.389000 | -2.273000 |
| H  | -5.831000 | -0.254000 | 5.067000  | H | -0.002000 | -0.436000 | -2.840000 |
| H  | -6.572000 | -0.382000 | 3.470000  | C | -5.063000 | 1.901000  | 3.467000  |
| C  | -4.991000 | 0.157000  | -2.019000 | H | -5.989000 | 1.987000  | 2.897000  |
| H  | -4.724000 | 1.176000  | -1.728000 | H | -4.321000 | 2.558000  | 3.010000  |
| H  | -4.893000 | 0.058000  | -3.103000 | C | 3.316000  | 3.722000  | -0.509000 |
| H  | -6.035000 | -0.021000 | -1.760000 | H | 3.712000  | 4.644000  | -0.949000 |
| C  | -4.574000 | -2.276000 | -1.515000 | H | 4.145000  | 3.193000  | -0.031000 |
| H  | -5.570000 | -2.387000 | -1.083000 | H | 2.924000  | 3.102000  | -1.318000 |
| H  | -4.637000 | -2.522000 | -2.579000 | C | 2.732000  | 5.219000  | 2.094000  |
| H  | -3.901000 | -2.990000 | -1.033000 | H | 1.961000  | 5.629000  | 2.751000  |
| C  | -6.195000 | -0.166000 | 0.868000  | H | 3.443000  | 4.658000  | 2.707000  |
| C  | -1.290000 | 3.591000  | 3.955000  | H | 3.268000  | 6.061000  | 1.642000  |
|    |           |           |           | C | -3.331000 | 0.388000  | 4.406000  |
|    |           |           |           | H | -2.555000 | 1.065000  | 4.041000  |

|                |            |           |           |   |           |           |           |
|----------------|------------|-----------|-----------|---|-----------|-----------|-----------|
| H              | -3.602000  | 0.691000  | 5.420000  | O | 1.759000  | -0.171000 | 1.772000  |
| H              | -2.922000  | -0.626000 | 4.443000  | O | -0.982000 | -2.361000 | -1.876000 |
| C              | 0.626000   | 5.161000  | -0.125000 | O | -2.671000 | -2.758000 | -0.209000 |
| H              | 0.164000   | 4.576000  | -0.921000 | N | 2.478000  | 1.150000  | -0.770000 |
| H              | -0.160000  | 5.448000  | 0.578000  | N | 2.842000  | -1.059000 | -0.664000 |
| H              | 1.063000   | 6.072000  | -0.551000 | C | -0.059000 | -0.449000 | 0.259000  |
| C              | 3.499000   | 0.305000  | 0.049000  | C | 4.577000  | 0.806000  | 1.705000  |
| H              | 4.484000   | 0.779000  | 0.075000  | H | 3.620000  | 0.949000  | 2.195000  |
| H              | 3.640000   | -0.752000 | -0.201000 | C | 3.312000  | 0.132000  | -0.363000 |
| H              | 2.935000   | 0.773000  | -0.761000 | C | 0.735000  | -0.735000 | 1.395000  |
| C              | 3.934000   | 0.788000  | 3.064000  | C | -1.455000 | -0.832000 | -0.100000 |
| H              | 4.424000   | 1.755000  | 2.917000  | C | 2.797000  | 2.571000  | -1.022000 |
| C              | -8.189000  | 1.118000  | 0.451000  | C | 3.298000  | -2.394000 | -0.197000 |
| C              | -6.956000  | -1.332000 | 0.943000  | C | -1.743000 | -1.977000 | -0.845000 |
| H              | 2.574000   | 2.965000  | 4.872000  | C | 4.127000  | 2.761000  | -1.797000 |
| H              | 2.510000   | -1.987000 | 2.119000  | H | 4.143000  | 2.183000  | -2.716000 |
| H              | 1.272000   | -1.161000 | 3.077000  | H | 4.261000  | 3.833000  | -2.051000 |
| H              | 0.659000   | -1.799000 | -1.886000 | H | 5.004000  | 2.464000  | -1.186000 |
| H              | -5.261000  | 2.233000  | 4.491000  | C | 3.877000  | -2.400000 | 1.250000  |
| H              | 3.484000   | 0.781000  | 4.062000  | H | 3.236000  | -1.753000 | 1.913000  |
| H              | 4.707000   | 0.013000  | 3.041000  | H | 3.898000  | -3.439000 | 1.639000  |
| H              | -8.668000  | 2.070000  | 0.254000  | H | 4.902000  | -2.001000 | 1.267000  |
| C              | -8.952000  | -0.045000 | 0.527000  | C | 4.334000  | -2.959000 | -1.179000 |
| H              | -6.473000  | -2.282000 | 1.144000  | H | 5.244000  | -2.349000 | -1.172000 |
| C              | -8.336000  | -1.269000 | 0.773000  | H | 4.613000  | -3.999000 | -0.902000 |
| H              | -10.027000 | 0.003000  | 0.393000  | H | 3.933000  | -2.978000 | -2.201000 |
| H              | -8.928000  | -2.174000 | 0.836000  | C | 4.599000  | 0.373000  | 0.361000  |
|                |            |           |           | C | -0.996000 | 3.056000  | 0.448000  |
|                |            |           |           | H | -0.686000 | 4.019000  | 0.023000  |
|                |            |           |           | H | -1.175000 | 3.186000  | 1.522000  |
|                |            |           |           | H | -0.171000 | 2.337000  | 0.322000  |
|                |            |           |           | C | 2.063000  | -3.313000 | -0.215000 |
|                |            |           |           | H | 1.593000  | -3.304000 | -1.222000 |
|                |            |           |           | H | 2.355000  | -4.355000 | 0.011000  |
|                |            |           |           | H | 1.305000  | -3.009000 | 0.518000  |
|                |            |           |           | C | 0.857000  | -2.059000 | 3.379000  |
| <b>Ts-2 Sn</b> |            |           |           |   |           |           |           |
| Sn             | 0.855000   | -0.095000 | -1.528000 |   |           |           |           |
| Si             | -3.052000  | 0.206000  | 0.289000  |   |           |           |           |
| Si             | -2.547000  | 2.434000  | -0.422000 |   |           |           |           |
| Si             | -4.892000  | -0.566000 | -1.018000 |   |           |           |           |
| Si             | -3.690000  | 0.341000  | 2.592000  |   |           |           |           |
| O              | 0.191000   | -1.805000 | 2.121000  |   |           |           |           |

|   |           |           |           |
|---|-----------|-----------|-----------|
| H | 0.916000  | -1.122000 | 3.974000  |
| H | 0.218000  | -2.796000 | 3.905000  |
| H | 1.876000  | -2.464000 | 3.241000  |
| C | -3.988000 | 3.599000  | 0.062000  |
| H | -3.735000 | 4.632000  | -0.222000 |
| H | -4.149000 | 3.567000  | 1.167000  |
| C | -2.341000 | 2.533000  | -2.301000 |
| H | -1.541000 | 1.858000  | -2.658000 |
| H | -3.267000 | 2.280000  | -2.830000 |
| H | -2.047000 | 3.560000  | -2.593000 |
| C | -4.329000 | -1.102000 | -2.738000 |
| H | -3.703000 | -2.021000 | -2.717000 |
| C | -1.107000 | -3.762000 | -2.224000 |
| H | -2.128000 | -3.995000 | -2.507000 |
| H | -0.806000 | -4.369000 | -1.355000 |
| C | 2.838000  | 3.352000  | 0.317000  |
| H | 3.738000  | 3.116000  | 0.884000  |
| H | 1.954000  | 3.091000  | 0.921000  |
| C | -3.605000 | -1.403000 | 3.311000  |
| H | -3.825000 | -1.415000 | 4.396000  |
| H | -4.340000 | -2.048000 | 2.787000  |
| H | -2.597000 | -1.836000 | 3.157000  |
| C | -5.449000 | 1.036000  | 2.749000  |
| H | -5.532000 | 2.067000  | 2.363000  |
| H | -6.195000 | 0.415000  | 2.210000  |
| H | -5.727000 | 1.046000  | 3.814000  |
| C | 1.686000  | 3.128000  | -1.909000 |
| H | 0.698000  | 2.980000  | -1.431000 |
| H | 1.818000  | 4.205000  | -2.069000 |
| H | 1.666000  | 2.629000  | -2.893000 |
| C | -2.552000 | 1.497000  | 3.588000  |
| H | -1.478000 | 1.310000  | 3.393000  |
| H | -2.746000 | 2.572000  | 3.367000  |
| H | -2.734000 | 1.344000  | 4.672000  |
| C | -5.831000 | -1.987000 | -0.181000 |
| H | -6.254000 | -1.677000 | 0.767000  |

|   |           |           |           |
|---|-----------|-----------|-----------|
| H | -6.658000 | -2.330000 | -0.837000 |
| H | -5.158000 | -2.844000 | -0.016000 |
| C | -6.124000 | 0.853000  | -1.269000 |
| H | -6.462000 | 1.283000  | -0.310000 |
| C | 5.781000  | 0.988000  | 2.375000  |
| C | 5.837000  | 0.162000  | -0.282000 |
| H | -4.935000 | 3.329000  | -0.420000 |
| H | -5.202000 | -1.337000 | -3.362000 |
| H | -3.756000 | -0.312000 | -3.239000 |
| H | -0.432000 | -3.923000 | -3.050000 |
| H | 2.823000  | 4.440000  | 0.128000  |
| H | -5.697000 | 1.683000  | -1.866000 |
| H | -7.014000 | 0.463000  | -1.796000 |
| H | 5.742000  | 1.293000  | 3.437000  |
| C | 6.996000  | 0.762000  | 1.762000  |
| H | 5.863000  | -0.138000 | -1.325000 |
| C | 7.032000  | 0.366000  | 0.422000  |
| H | 7.938000  | 0.916000  | 2.289000  |
| H | 7.986000  | 0.207000  | -0.098000 |

### 3<sub>trans</sub>

|    |             |            |             |
|----|-------------|------------|-------------|
| 97 |             |            |             |
| Si | -2.72620400 | 0.23705700 | 0.33876300  |
| Si | -3.99795000 | 1.75338200 | -0.93741100 |
| Si | -2.24353800 | 1.28441100 | 2.39996000  |
| O  | 0.90471100  | 1.20821500 | 1.09011500  |
| C  | 0.43398700  | 1.25449600 | -0.02222000 |
| O  | 0.28054400  | 2.38633100 | -0.72889600 |
| C  | 4.29997000  | 2.52214500 | -0.86302900 |
| H  | 4.72776600  | 3.36254700 | -1.41688200 |
| H  | 5.07410100  | 2.12838600 | -0.20259900 |
| H  | 3.47706900  | 2.89514500 | -0.24879300 |
| C  | 3.79932800  | 1.46629900 | -1.85547900 |
| C  | -1.55594900 | 3.03668900 | 2.30227400  |
| H  | -2.08816100 | 3.64683000 | 1.56617400  |
| H  | -0.49258000 | 3.03580300 | 2.06441000  |

|    |             |             |             |   |             |             |             |
|----|-------------|-------------|-------------|---|-------------|-------------|-------------|
| H  | -1.68122300 | 3.51342500  | 3.28112100  | H | -0.08601400 | 0.32441800  | 3.15683200  |
| C  | -3.95678800 | 1.43979000  | 3.21688400  | H | -1.40802400 | -0.79068700 | 3.54252600  |
| H  | -4.00580000 | 0.83526600  | 4.12701700  | H | 4.63623200  | 0.04080500  | -3.26213400 |
| H  | -4.77936800 | 1.12910100  | 2.56925300  | H | 5.54584100  | 1.55919100  | -3.13596500 |
| H  | -4.13517900 | 2.48223800  | 3.49898500  | H | 5.67128500  | 0.34981200  | -1.85169400 |
| C  | 2.91080600  | 2.14067300  | -2.90490000 | C | 3.25722300  | -0.39886100 | -0.22670900 |
| H  | 2.58678700  | 1.41596400  | -3.65814200 | O | -2.87836600 | -1.41832100 | -2.09891000 |
| H  | 3.46397900  | 2.93249200  | -3.41508600 | O | -0.82636600 | -2.30187900 | -2.13737100 |
| H  | 2.02136900  | 2.57269900  | -2.44196100 | H | -5.89270200 | -3.00063400 | 0.24197300  |
| C  | -2.82524200 | 3.05665700  | -1.63113400 | H | -5.21667100 | -2.13762800 | -1.14927800 |
| H  | -3.38497600 | 3.77852400  | -2.23631600 | H | -6.14780300 | -1.25992600 | 0.07449500  |
| H  | -2.05554100 | 2.60304400  | -2.26107100 | H | -3.10444700 | -4.10427000 | 1.18956800  |
| H  | -2.31708300 | 3.60311300  | -0.83139000 | H | -2.45603100 | -3.46045300 | -0.31809600 |
| C  | -4.90612000 | 0.94880100  | -2.37956000 | H | -1.71260800 | -3.01477500 | 1.22446200  |
| H  | -5.54451600 | 0.12468800  | -2.05045200 | H | -4.76293200 | -2.81857000 | 2.96351800  |
| H  | -4.20139200 | 0.55962100  | -3.11779900 | H | -5.23480400 | -1.11708300 | 2.94084100  |
| H  | -5.54047000 | 1.69522300  | -2.87076500 | H | -3.60014300 | -1.57616000 | 3.44048000  |
| C  | 0.76190900  | 3.62181000  | -0.18681300 | N | 2.42669300  | -1.43371000 | -0.25678500 |
| H  | -0.09365300 | 4.24272700  | 0.07827600  | C | 4.34658000  | -0.19453900 | 0.77237800  |
| H  | 1.33974600  | 4.11474400  | -0.96856800 | C | -3.30024900 | -2.40395700 | -3.04618100 |
| H  | 1.38345100  | 3.44901500  | 0.69003300  | C | 2.15667900  | -2.47117200 | 0.75700600  |
| C  | -5.27114100 | 2.62507500  | 0.14992900  | C | 5.60856100  | -0.75817000 | 0.59090700  |
| H  | -4.79931400 | 3.16069900  | 0.97890400  | C | 4.07882300  | 0.57451600  | 1.90490800  |
| H  | -5.99907200 | 1.92467700  | 0.56991900  | H | -2.66858800 | -2.37212100 | -3.93419300 |
| H  | -5.82124400 | 3.35695600  | -0.45196500 | H | -4.32569000 | -2.14887700 | -3.30508000 |
| C  | -1.26427800 | -0.36035000 | -0.76829800 | H | -3.25714700 | -3.40051900 | -2.60208700 |
| Si | -3.86185900 | -1.76220800 | 0.93474500  | C | 1.35767300  | -3.55955300 | 0.03851600  |
| C  | -1.11655000 | 0.26292700  | 3.51212200  | C | 3.43308200  | -3.09974300 | 1.33032600  |
| C  | 0.00527700  | 0.08353700  | -0.82576600 | C | 1.31030200  | -1.88419200 | 1.89163300  |
| C  | 4.98745200  | 0.80939800  | -2.56784400 | H | 5.80862500  | -1.36895900 | -0.28251600 |
| N  | 2.95037200  | 0.44863600  | -1.21021300 | C | 6.60405400  | -0.54674600 | 1.53925600  |
| C  | -1.59549900 | -1.46618700 | -1.71767100 | H | 3.09232700  | 1.00876100  | 2.02821500  |
| C  | -5.42213000 | -2.06476400 | -0.07986100 | C | 5.07499900  | 0.77597400  | 2.85528700  |
| C  | -2.66712900 | -3.21346700 | 0.72512300  | H | 1.08484500  | -4.34879800 | 0.74323000  |
| C  | -4.40967900 | -1.80471900 | 2.74276600  | H | 1.94911500  | -4.00276000 | -0.76828400 |
| H  | -1.15658500 | 0.65385800  | 4.53504900  | H | 0.44195400  | -3.14925200 | -0.39256600 |

|                          |             |             |             |    |             |             |             |
|--------------------------|-------------|-------------|-------------|----|-------------|-------------|-------------|
| H                        | 4.11822000  | -3.39114100 | 0.52979300  | H  | 2.20297900  | -0.00312900 | -3.48467600 |
| H                        | 3.15619300  | -3.99855100 | 1.88802500  | C  | -3.04895200 | 0.80085200  | -3.31293100 |
| H                        | 3.95507100  | -2.43106900 | 2.01559900  | H  | -3.64054200 | 0.83297200  | -4.23461900 |
| H                        | 1.85220000  | -1.08873900 | 2.40796900  | H  | -2.30169400 | 0.00884300  | -3.41307100 |
| H                        | 1.06328300  | -2.66765600 | 2.61503600  | H  | -2.51285800 | 1.74949900  | -3.21819500 |
| H                        | 0.38513700  | -1.45777400 | 1.49801400  | C  | -5.08747400 | -1.13198500 | -2.11199000 |
| H                        | 7.58539200  | -0.98433900 | 1.39631300  | H  | -5.68936700 | -1.41378900 | -1.24418300 |
| C                        | 6.33803300  | 0.21855000  | 2.67238500  | H  | -4.38807900 | -1.94503900 | -2.31962100 |
| H                        | 4.86513300  | 1.37078300  | 3.73688500  | H  | -5.75785700 | -1.02810800 | -2.97251400 |
| H                        | 7.11410800  | 0.37858200  | 3.41216800  | C  | 0.65524900  | 2.29873600  | -3.02010700 |
| Ge                       | 1.52677200  | -0.78437900 | -1.95075400 | H  | -0.21271200 | 2.80986000  | -3.43767800 |
| <b>4<sub>trans</sub></b> |             |             |             | H  | 1.35671100  | 2.06083400  | -3.82023400 |
| 97                       |             |             |             | H  | 1.13801500  | 2.92802800  | -2.27518800 |
| Si                       | -2.80084100 | 0.47683800  | 0.08410000  | C  | -5.44312500 | 1.88170100  | -1.73852200 |
| Si                       | -4.17110100 | 0.49046300  | -1.82919700 | H  | -4.96895200 | 2.86001300  | -1.61682900 |
| Si                       | -2.31152900 | 2.73334000  | 0.57817900  | H  | -6.14248100 | 1.73924500  | -0.90931800 |
| O                        | 0.77621200  | 1.69392200  | -0.35533800 | H  | -6.02574700 | 1.90393000  | -2.66615200 |
| C                        | 0.32584000  | 0.87156300  | -1.11957700 | C  | -1.35278200 | -0.73435700 | -0.30302800 |
| O                        | 0.21235200  | 1.06293000  | -2.44699000 | Si | -3.81575200 | -0.39785200 | 2.04348300  |
| C                        | 4.17196200  | 1.45639300  | -2.18732800 | C  | -1.08076800 | 2.96881800  | 1.98471800  |
| H                        | 4.56893100  | 1.75412300  | -3.16221800 | C  | -0.10914300 | -0.49238600 | -0.75792700 |
| H                        | 4.88976300  | 1.76563200  | -1.42607000 | C  | 5.27946900  | -0.79922200 | -2.14140100 |
| H                        | 3.23470500  | 1.99038900  | -2.01391800 | N  | 3.06243600  | -0.49903100 | -1.07427100 |
| C                        | 3.93570400  | -0.06038100 | -2.17271800 | C  | -1.65086100 | -2.18086600 | -0.08462100 |
| C                        | -1.76467500 | 3.77045800  | -0.89749800 | C  | -5.40198700 | -1.35396400 | 1.69055800  |
| H                        | -2.42451400 | 3.63088700  | -1.75914900 | C  | -2.57150600 | -1.51449500 | 2.92762300  |
| H                        | -0.74059300 | 3.54442500  | -1.19194100 | C  | -4.28009500 | 0.93874300  | 3.29462700  |
| H                        | -1.80597800 | 4.82893700  | -0.61604500 | H  | -1.09441000 | 4.01520600  | 2.31008600  |
| C                        | -3.99322700 | 3.44255800  | 1.12038200  | H  | -0.07194000 | 2.71918700  | 1.65154200  |
| H                        | -4.18663800 | 4.37630200  | 0.58232500  | H  | -1.32350600 | 2.34495700  | 2.84984500  |
| H                        | -3.98902900 | 3.66957600  | 2.18993800  | H  | 5.11731800  | -1.88075100 | -2.12013600 |
| H                        | -4.83366700 | 2.77176400  | 0.92766700  | H  | 5.86396400  | -0.55516900 | -3.03371600 |
| C                        | 3.19468700  | -0.46133900 | -3.45360900 | H  | 5.86650000  | -0.51613600 | -1.26607700 |
| H                        | 3.06997100  | -1.54811300 | -3.49870900 | C  | 3.20080200  | -0.31996900 | 0.23432100  |
| H                        | 3.75559400  | -0.14934500 | -4.33774400 | O  | -2.94703200 | -2.46173100 | -0.22100000 |
|                          |             |             |             | O  | -0.82615000 | -3.04281600 | 0.15693400  |

|   |             |             |             |    |            |             |             |
|---|-------------|-------------|-------------|----|------------|-------------|-------------|
| H | -5.81576700 | -1.74050200 | 2.62870100  | H  | 4.29374700 | 3.92163900  | 1.77837700  |
| H | -5.23636000 | -2.19740100 | 1.01820400  | H  | 6.58484200 | 3.22590100  | 2.42451400  |
| H | -6.15680300 | -0.70170200 | 1.23991400  | Sn | 1.51376100 | -2.10857800 | -0.85906900 |
| H | -2.97404100 | -1.78969900 | 3.90892600  |    |            |             |             |
| H | -2.35163400 | -2.44290600 | 2.39487000  |    |            |             |             |
| H | -1.62612400 | -0.98813900 | 3.09408000  |    |            |             |             |
| H | -4.59200100 | 0.44439400  | 4.22182700  |    |            |             |             |
| H | -5.11387500 | 1.55484000  | 2.95079400  |    |            |             |             |
| H | -3.44371900 | 1.59993500  | 3.53580200  |    |            |             |             |
| N | 2.39056600  | -1.10354300 | 0.94362300  |    |            |             |             |
| C | 4.15240200  | 0.66280000  | 0.84330600  |    |            |             |             |
| C | -3.32954500 | -3.83449400 | -0.07770500 |    |            |             |             |
| C | 2.04333900  | -1.02358200 | 2.37461500  |    |            |             |             |
| C | 5.43999500  | 0.27144400  | 1.20754000  |    |            |             |             |
| C | 3.74210700  | 1.98027100  | 1.04690300  |    |            |             |             |
| H | -2.75737600 | -4.46048300 | -0.76243700 |    |            |             |             |
| H | -4.38794100 | -3.87564200 | -0.32514300 |    |            |             |             |
| H | -3.16586200 | -4.16743500 | 0.94888800  |    |            |             |             |
| C | 1.28006300  | -2.31458400 | 2.68311200  |    |            |             |             |
| C | 3.26111300  | -0.95534200 | 3.30828000  |    |            |             |             |
| C | 1.12305700  | 0.17549300  | 2.63676000  |    |            |             |             |
| H | 5.75327700  | -0.75668700 | 1.06236700  |    |            |             |             |
| C | 6.31518700  | 1.19445000  | 1.77155000  |    |            |             |             |
| H | 2.74287600  | 2.27448100  | 0.74482600  |    |            |             |             |
| C | 4.61658700  | 2.89897300  | 1.61929000  |    |            |             |             |
| H | 0.96132200  | -2.32794200 | 3.72837400  |    |            |             |             |
| H | 1.91530900  | -3.18756200 | 2.50313400  |    |            |             |             |
| H | 0.39066900  | -2.39795100 | 2.05408900  |    |            |             |             |
| H | 4.00255400  | -1.71170000 | 3.03622200  |    |            |             |             |
| H | 2.92991100  | -1.15443500 | 4.33142300  |    |            |             |             |
| H | 3.73976000  | 0.02421000  | 3.29999900  |    |            |             |             |
| H | 1.64236100  | 1.11532200  | 2.44085500  |    |            |             |             |
| H | 0.79389400  | 0.17490100  | 3.68112700  |    |            |             |             |
| H | 0.24573400  | 0.13462500  | 1.98658600  |    |            |             |             |
| H | 7.31544900  | 0.88591200  | 2.05349900  |    |            |             |             |
| C | 5.90373000  | 2.50845700  | 1.98104600  |    |            |             |             |
